# Supplementary material for: The regulation of coralline algal physiology, an in-situ study of Corallina officinalis (Corallinales, Rhodophyta)
Source: Copernicus journal article supplement (doi:10.5194/bg-2017-135), 2017-05-12
Supplement: Supplementary file 1 [file bg-2017-135-supplement.pdf]

## Supplementary Figures

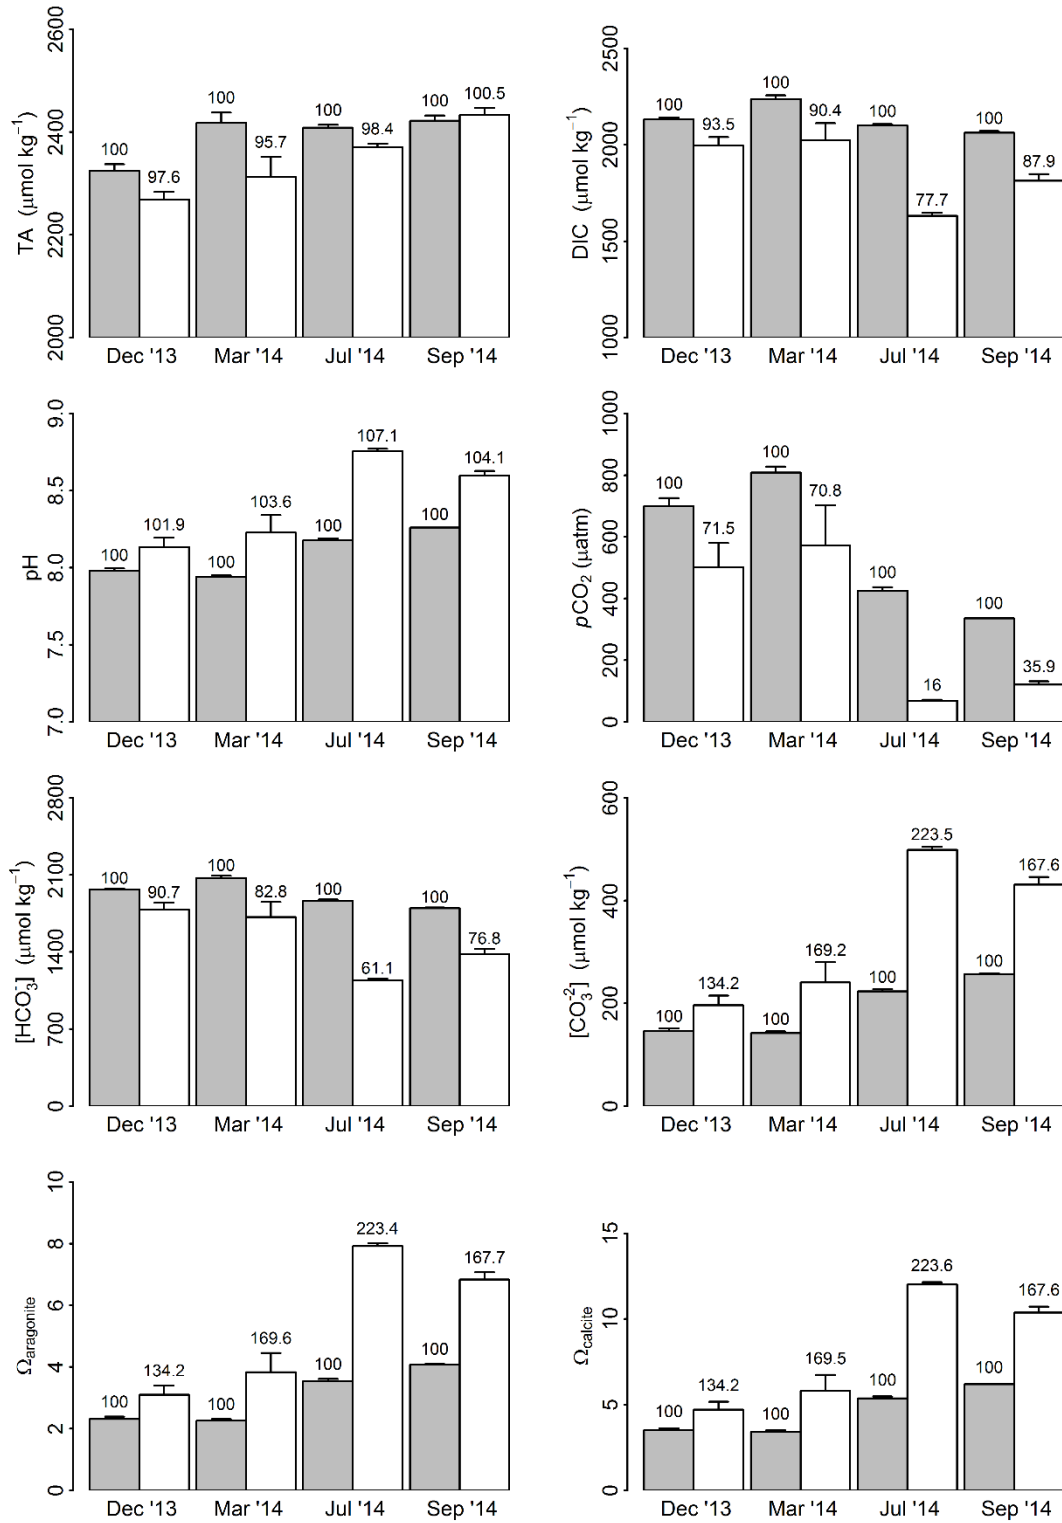

**Supp. Figure 1:** Average carbonate chemistry (TA, DIC, pH,  $p\text{CO}_2$ ,  $\text{HCO}_3^-$ ,  $\text{CO}_3^{2-}$ ,  $\Omega_{\text{arg}}$  and  $\Omega_{\text{cal}}$ ) recorded at the start (grey bars) and end (white bars) of daytime tidal emersion periods during December 2013 (Dec '13), and March (Mar '14), July (Jul '14) and September (Sep '14) 2014 (Average  $\pm$  SE,  $n = 12$ ). Numbers denote % change in parameters in relation to start emersion values.

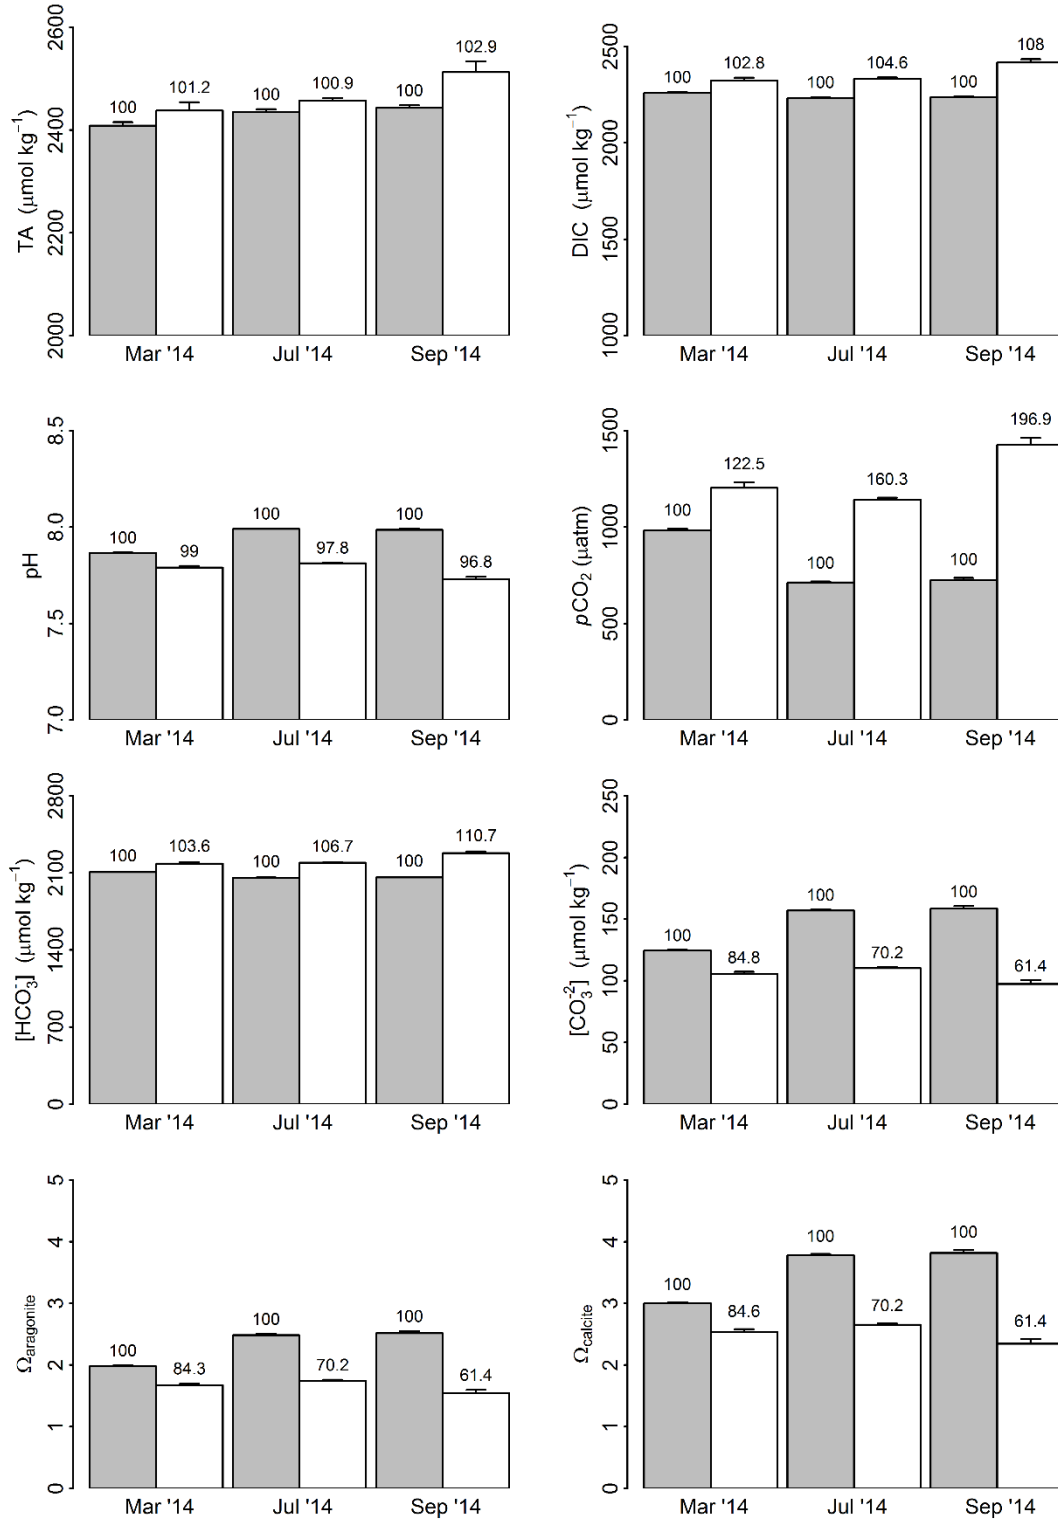

**Supp Figure 2:** Average carbonate chemistry (TA, DIC, pH,  $p\text{CO}_2$ ,  $\text{HCO}_3^-$ ,  $\text{CO}_3^{2-}$ ,  $\Omega_{\text{arg}}$  and  $\Omega_{\text{cal}}$ ) recorded at the start (grey bars) and end (white bars) of night-time tidal emersion periods during March (Mar '14), July (Jul '14) and September (Sep '14) 2014 (Average  $\pm$  SE,  $n = 12$ ). Numbers denote % change in parameters in relation to start emersion values.
