# Supplementary material for: The regulation of coralline algal physiology, an in-situ study of Corallina officinalis (Corallinales, Rhodophyta)
Source: Copernicus journal article supplement (doi:10.5194/bg-2017-135), 2017-05-12
Supplement: Supplementary file [file bg-2017-135-AC1-supplement.pdf]

1 **The regulation of coralline algal physiology, an *in-situ* study of *Corallina***

2 ***officinalis* (Corallinales, Rhodophyta)**

3 Williamson Christopher James<sup>1,2\*</sup>, Perkins Rupert<sup>3</sup>, Voller Matthew<sup>1</sup>, Yallop Marian  
4 Louise<sup>2</sup>, Brodie Juliet<sup>1</sup>.

5  
6 1. The Natural History Museum, Department of Life Sciences, Cromwell Road,  
7 London SW7 5BD, UK

8 2. School of Biological Sciences, Life Sciences Building, 24 Tyndall Avenue,  
9 Bristol, BS8 1TQ, UK

10 3. School of Earth and Ocean Sciences, Cardiff University, Cardiff, CF10 3AT, UK

11  
12 \*Corresponding author Email: [c.williamson@nhm.ac.uk](mailto:c.williamson@nhm.ac.uk)

13  
14 **Running title:** Drivers of coralline algae physiology

15  
16 **Keywords:** *Corallina*, calcification, productivity, respiration, carbonate chemistry,  
17 ocean acidification, climate change

26

27

## Abstract

28 Calcified macroalgae are critical components of marine ecosystems worldwide, but  
29 face considerable threat both from climate change (increasing water temperatures) and  
30 ocean acidification (decreasing ocean pH and carbonate saturation). It is thus  
31 fundamental to constrain the relationships between key abiotic stressors and the  
32 physiological processes that govern coralline algal growth and survival. Here we  
33 characterize the complex relationships between the abiotic environment of rock pool  
34 habitats, and the physiology of the geniculate red coralline alga, *Corallina officinalis*  
35 (Corallinales, Rhodophyta). Paired assessment of irradiance, water temperature and  
36 carbonate chemistry, with *C. officinalis* net production (*NP*), respiration (*R*) and net  
37 calcification (*NG*) was performed in a south-west UK field site, at multiple temporal  
38 scales (seasonal, diurnal and tidal). Strong seasonality was observed in *NP* and night-  
39 time *R*, with a  $P_{max}$  of 22.35  $\mu\text{mol DIC gDW}^{-1} \text{h}^{-1}$ ,  $E_k$  of 300  $\mu\text{mol photons m}^{-2} \text{s}^{-1}$  and  
40 *R* of 3.29  $\mu\text{mol DIC gDW}^{-1} \text{h}^{-1}$  determined across the complete annual cycle. *NP*  
41 showed a significant exponential relationship with irradiance ( $R^2 = 0.67$ ), although was  
42 temperature dependent given ambient irradiance  $> E_k$  for the majority of the annual  
43 cycle. Over tidal emersion periods, dynamics in *NP* highlighted the ability of *C.*  
44 *officinalis* to acquire inorganic carbon despite significant fluctuations in carbonate  
45 chemistry. Across all data, *NG* was highly predictable ( $R^2 = 0.80$ ) by irradiance, water  
46 temperature and carbonate chemistry, providing a  $NG_{max}$  of 3.94  $\mu\text{mol CaCO}_3 \text{gDW}^{-1}$   
47  $\text{h}^{-1}$ , and  $E_k$  of 113  $\mu\text{mol photons m}^{-2} \text{s}^{-1}$ . Light-*NG* showed strong seasonality and  
48 significant coupling to *NP* ( $R^2 = 0.65$ ), as opposed to rock pool water carbonate  
49 saturation. In contrast, the direction of dark-*NG* (dissolution vs. precipitation) was  
50 strongly related to carbonate saturation, mimicking abiotic precipitation dynamics.

51 Data demonstrated that *C. officinalis* is adapted to both long-term (seasonal) and short-  
52 term (tidal) variability in environmental stressors, although the balance between  
53 metabolic processes and the external environment may be significantly impacted by  
54 future climate change.

55

## 56 **1. Introduction**

57 Calcified macroalgae are critical components of marine ecosystems from polar to  
58 tropical regions (Littler et al., 1985, McCoy and Kamenos, 2015), constituting one of  
59 the most important structural elements in many coastal zones (van der Heijden and  
60 Kamenos, 2015). In shallow temperate areas, heavily calcified ‘coralline’ red  
61 macroalgae (Corallinales, Rhodophyta) act as autogenic ecosystem engineers  
62 (Johansen, 1981; Jones et al., 1994; Nelson, 2009), providing habitat for numerous  
63 small invertebrates, shelter from the stresses of intertidal life via their physical  
64 structure, and surfaces for the settlement of epifauna and microalgal epiphytes (Nelson,  
65 2009; Perkins et al., 2016). Temperate corallines are also of significant importance in  
66 the carbon and carbonate cycles of shallow coastal ecosystems, due to their relatively  
67 high productivity and calcium carbonate precipitation and dissolution (Martin and  
68 Gattuso, 2009; van der Heijden and Kamenos, 2015).

69

70 Species of the geniculate (jointed) coralline genus *Corallina* form extensive turfs across  
71 large areas of NE Atlantic intertidal regions, providing substratum, habitat and refugia  
72 for a number of important organisms (Coull and Wells, 1983; Kelaher, 2002; 2003;  
73 Hofmann et al., 2012a; Brodie et al., 2016; Perkins et al., 2016). Within rock pool  
74 habitats, *Corallina* must maintain productivity and growth under the influence of a  
75 myriad of highly variable stressors, including irradiance, water temperature and

76 carbonate chemistry, which fluctuate on seasonal, diurnal and tidal time scales  
77 (Egilsdottir et al., 2013; Williamson et al., 2014a). During summer, high irradiance,  
78 water temperature, pH and carbonate saturation ( $\Omega\text{CO}_3^{2-}$ ) dominate, whilst winter is  
79 associated with limiting irradiance and temperature, and decreased water pH (i.e.  
80 increased acidity) and  $\Omega\text{CO}_3^{2-}$  (Ganning, 1971; Morris and Taylor, 1983; Williamson  
81 et al., 2014a). Across daytime tidal emersion periods, rock pool water temperatures  
82 generally increase and community photosynthetic activity serves to strip  $\text{CO}_2$  and  
83  $\text{HCO}_3^-$  from the water, with concomitant increases in pH and  $\Omega\text{CO}_3^{2-}$  (Williamson et  
84 al., 2014a). In contrast, night-time emersion is dominated by respiration processes  
85 within rock pools, with  $\text{CO}_2$  production driving down water pH and  $\Omega\text{CO}_3^{2-}$  (Morris  
86 and Taylor, 1983). In order to sustain their dominance of temperate coastlines,  
87 *Corallina* must balance this environmental variability with their requirements for key  
88 physiological processes, including photosynthesis, respiration and calcification.

89

90 The interactions between *Corallina* physiology and environmental variability are likely  
91 to be significantly impacted by on-going climate change (increasing temperatures) and  
92 ocean acidification (decreasing pH and  $\Omega\text{CO}_3^{2-}$ ) (Hofmann et al., 2012a;b; McCoy and  
93 Kamenos, 2015). Water temperature profoundly influences the survival, recruitment,  
94 growth and reproduction of macroalgal species (Breeman, 1988), and is a key factor  
95 governing both the small- and large-scale distribution of species (Breeman, 1988;  
96 Luning, 1990; Jueterbock et al., 2013). With continued increases in water temperatures,  
97 some macroalgal species and populations may become chronically (gradual warming)  
98 or acutely (extreme events) stressed as temperatures exceed physiological thresholds  
99 (Brodie et al., 2014). With OA driven increases in seawater dissolved organic carbon  
100 (DIC) concentrations, several studies have predicted a positive response of macroalgal

101 photosynthesis (Marberly, 1990; Johnston et al., 1992), though with notable exceptions  
102 (Israel and Hophy, 2002). Such responses are likely to be determined by the ability of  
103 macroalgae to utilize seawater  $\text{HCO}_3^-$ , and whether photosynthesis is saturated at  
104 current seawater DIC (Koch et al., 2013). In contrast, calcification and dissolution  
105 processes of calcified macroalgae are likely to be negatively impacted by OA driven  
106 changes in seawater carbonate chemistry (Ries, 2011; Koch et al., 2013). In particular,  
107 increases in  $\text{CO}_2$  and  $\text{H}^+$  in external seawater will increase diffusion rates to internal  
108 sites of calcification, lowering internal  $\Omega\text{CO}_3^{2-}$ , and decreasing  $\text{CaCO}_3$  precipitation  
109 (Jokiel, 2011; Ries, 2011; Koch et al., 2013). The ability to control ion transport across  
110 membranes and internal pH regulation, are therefore likely to be major factors  
111 determining calcified macroalgal responses to OA (Koch et al., 2013). It is therefore  
112 critical to constrain *Corallina* ecophysiology in relation to current environmental  
113 variability, to aid projections under future climate scenarios (Nelson, 2009; Koch et al.,  
114 2013; Brodie et al., 2014; Hofmann and Bischof, 2014). It is also important to  
115 understand the present-day role of these dominant community members in coastal  
116 carbon cycles and how this may change into the future (van der Heijden and Kamenos,  
117 2015).

118

119 This study focuses on *Corallina officinalis*, a species that dominates North Atlantic  
120 turfing assemblages (Williamson et al., 2015) and has been the focus of recent studies  
121 aiming to understand coralline algal physiology and future fate (Hofmann et al.,  
122 2012a,b; Williamson et al., 2014a,b; Williamson et al., 2015; Perkins et al., 2016).  
123 Whilst the skeletal mineralogy (Williamson et al., 2014b), photophysiology  
124 (Williamson et al., 2014a; Perkins et al., 2016), and phylogenetics of *C. officinalis*  
125 (Williamson et al., 2015) have been examined, information on *in-situ* physiology in

126 relation to key environmental stressors is currently lacking. We therefore performed the  
127 first high-resolution *in-situ* assessment of *C. officinalis* physiology (production,  
128 respiration and calcification) in relation to key environment stressors (irradiance,  
129 temperature and carbonate chemistry) over both daytime and night-time tidal emersion  
130 periods, across multiple seasons. By characterizing the influence of abiotic stressors on  
131 key physiological processes, this study advances efforts to understand the ecology and  
132 fate of coralline algae in a changing world.

133

## 134 **2. Methods**

135 This study was conducted at Combe Martin (CM), north Devon, UK (51°12'13N  
136 4°2'19W, Fig. 1), a north-west facing rocky intertidal site, positioned within a sheltered  
137 bay. *Corallina officinalis* dominates intertidal rock pools at CM, including large (ca. 40  
138 m<sup>3</sup>, 0.5 m depth) upper shore (Chart Datum + 5.5 m) rock pools created by a man-made  
139 walkway (Fig. 1b and 1c). This site is located in the middle of *C. officinalis*' range  
140 across the NE Atlantic, which spans from Iceland to northern Spain (Williamson et al.,  
141 2015).

142

143 To assess *C. officinalis* net production, respiration and calcification, incubation  
144 experiments were performed at CM during daytime tidal emersion in December 2013,  
145 and March, July and September 2014, and night-time tidal emersion during the latter  
146 three sampling months (sampling dates and tidal timings are presented in Table 1), to  
147 capture the tidal, diurnal and full seasonal dynamics in physiology. Two sets of  
148 approximately 1 h timed incubations were performed per emersion period, at both the  
149 start (initiated within 30 mins of tidal emersion) and end (over the final 1.5 h) of

150 emersion. Irradiance and rock pool water salinity, temperature and carbonate chemistry  
151 were monitored in parallel throughout.

152

### 153 **2.1. Physiology incubations**

154 Net production (*NP*) and respiration (*R*) (DIC flux,  $\mu\text{mol g dry weight (DW)}^{-1} \text{h}^{-1}$ ), and  
155 net light and dark calcification rates (*NG*) ( $\mu\text{mol CaCO}_3 \text{gDW}^{-1} \text{h}^{-1}$ ) were determined  
156 using closed chamber incubations. Ten discrete *C. officinalis* fronds were collected  
157 randomly across upper shore CM rock pools of the same shore height, and similar  
158 size/depth, and placed individually into 0.5 l clear glass chambers filled with rock pool  
159 water. Our previous study in these upper shore rock pools revealed no significant  
160 difference in the progression of temperature or carbonate chemistry dynamics over  
161 summer or winter tidal emersion periods (Williamson et al. 2014). Final dry weight of  
162 incubated *C. officinalis* averaged  $4.0 \pm 0.15$  g across incubations. Two additional  
163 chambers were filled only with rock pool water to serve as controls for non-*Corallina*  
164 biological activity. At the beginning of incubations, 100 ml initial rock pool water  
165 samples were collected for pH and total alkalinity (TA) determination (see below), and  
166 poisoned with saturated mercuric chloride solution to prevent biological activity.  
167 Incubation chambers were then sealed, and six chambers (5 *Corallina*, 1 control)  
168 positioned in an upper shore rock pool to maintain ambient irradiance and temperature  
169 conditions (both during day and night-time). The remaining six chambers (5 *Corallina*,  
170 1 control) were placed in opaque bags to create dark conditions during daytime  
171 incubations (or shield from moonlight during night-time) and placed within the same  
172 rock pool to maintain ambient temperature. After incubating for ca. 1 h, chambers were  
173 removed from the rock pool and a final 100 ml water sample was collected from each  
174 chamber for pH and TA measurements. In parallel to all incubations, ambient irradiance

175 (PAR  $\mu\text{mol photons m}^{-2} \text{ s}^{-1}$ ), rock pool water temperature ( $^{\circ}\text{C}$ ), and salinity (S), were  
176 monitored every 30 min using a 2-pi LI-COR cosine-corrected quantum sensor  
177 positioned ca. 5 cm above the surface of the rock pool (15 s average irradiance  
178 measurements were taken using an in-built function of the sensor), a digital  
179 thermometer, and a hand-held refractometer, respectively. Cumulative photodose  
180 (PAR,  $\text{mol photons m}^{-2}$ ) was calculated from irradiance measurements by integrating  
181 PAR over time from the start of tidal emersion of rock pools. Following incubations,  
182 *C. officinalis* fronds were collected from incubation chambers for weighing after drying  
183 at  $100^{\circ}\text{C}$  for 24 h.

184

185 The pH (total scale) of water samples was measured immediately using a Mettler  
186 Toledo Inlab-expertpro pH probe calibrated using Tris-buffers (pH 4, 7, and 10)  
187 prepared in artificial seawater. TA of water samples was measured by the  
188 potentiometric method using Gran titration with a Mettler Toledo DL50 Graphix  
189 automatic titrator. Reference material measurements of  $\text{Na}_2\text{CO}_3$  standards (0.5 and 1  
190  $\text{mmol kg}^{-1}$ ) prepared in  $0.6 \text{ mol kg}^{-1}$  NaCl background medium were used to correct  
191 sample measurement for accuracy. The relative error of TA measurements was  $4.6 \pm$   
192  $0.24 \%$ , with a relative standard deviation of  $3.35 \pm 1.5 \%$ . pH, TA, water temperature  
193 and salinity were subsequently input into CO2SYS v2.1 (Pierrot et al., 2016) to  
194 determine all carbonate chemistry parameters (DIC,  $p\text{CO}_2$ ,  $\text{HCO}_3^-$ ,  $\text{CO}_3^{2-}$  and the  
195 saturation states of aragonite [ $\Omega_{\text{arg}}$ ] and calcite [ $\Omega_{\text{cal}}$ ]), allowing both calculation of *C.*  
196 *officinalis* NP/R ( $\Delta\text{DIC}$ ) and NG ( $\Delta\text{TA}$ ) during incubations, and the monitoring of  
197 ambient rock pool water carbonate chemistry. CO2SYS was run using the constants of  
198 Mehrbach et al. (1973) refitted by Dickson and Millero (1987). The carbonate  
199 chemistry of rock pool water was represented by initial water samples ( $n = 12$ ) collected



200 at the beginning of each incubation experiment, providing an assessment of water  
 201 chemistry at both the start and end of tidal emersion periods, matching productivity  
 202 analyses. *C. officinalis* NP (assessed from daytime light treatment incubations) and *R*  
 203 (assessed from daytime dark treatment and all night-time incubations) were calculated  
 204 from the difference between initial and final incubation DIC concentrations, as:

205

$$206 \quad NP \text{ or } R_{DAY/NIGHT} = \left( \frac{\Delta DIC}{dw \Delta t} v \right) - NG$$

207

208 where *NP* and *R<sub>DAY/NIGHT</sub>* are net production and respiration during the day or night,  
 209 respectively ( $\mu\text{mol DIC gDW}^{-1} \text{ h}^{-1}$ );  $\Delta\text{DIC}$  is the change in dissolved inorganic carbon  
 210 concentration during the incubation ( $\mu\text{mol DIC kg}^{-1} \text{ seawater}$ ); *v* is the incubation  
 211 chamber volume (l); *dw* is the dry weight of *C. officinalis* incubated (g);  $\Delta t$  is the  
 212 incubation time (h); and *NG* is the net calcification rate ( $\mu\text{mol CaCO}_3 \text{ gDW}^{-1} \text{ h}^{-1}$ ). *NG*  
 213 was estimated using the alkalinity anomaly technique (Smith and Key, 1975; Chisholm  
 214 and Gattuso, 1991), whereby TA decreases by 2 equivalents for each mol of  $\text{CaCO}_3$   
 215 precipitated. Light calcification (assessed from daytime light treatment incubations)  
 216 and dark calcification (assessed from daytime dark and all night-time incubations) were  
 217 thus calculated as:

$$218 \quad NG_{DAY} \text{ (or } NG_{NIGHT})_{-LIGHT/DARK} = \frac{\Delta TA v}{2(dw \Delta t)}$$

219

220 where *NG<sub>DAY-LIGHT/DARK</sub>* and *NG<sub>NIGHT-LIGHT/DARK</sub>* are net calcification during daytime or  
 221 night-time tidal emersion periods, determined from light or dark treatment incubations  
 222 ( $\mu\text{mol CaCO}_3 \text{ gDW}^{-1} \text{ h}^{-1}$ );  $\Delta\text{TA}$  is the change in total alkalinity during the incubation

223 ( $\mu\text{mol kg}^{-1}$  seawater);  $v$  is the incubation chamber volume (l);  $dw$  is the dry weight of  
224 *C. officinalis* incubated (g); and  $\Delta t$  is the incubation time (h).

225

## 226 **2.2. Data analysis**

227 All statistical analyses and plotting of data were performed using R v.3.0.2 (R Core  
228 Team, 2014). Prior to all analyses, normality of data was tested using the Shapiro-Wilk  
229 test and examination of frequency histograms. If data were not normally distributed,  
230 Box-Cox power transformation was applied using the boxcox function of the MASS  
231 package (Venables and Ripley, 2002), and normality re-checked. Following the  
232 application of models to data, model assumptions were checked by examination of  
233 model criticism plots. Whilst sampling for determination of *NP*, *R* and *NG* was  
234 performed in the same rock pools over a number of dates at each site, measurements  
235 were performed on different individuals during each sampling date and thus repeated  
236 measures analysis of variance (ANOVA) was not utilized during the present study.

237

238 *Abiotic Environment:* Differences in irradiance and rock pool water temperature  
239 between sampling months and tidal emersion periods were examined using 2-way  
240 ANOVA with interaction. Post hoc Tukey honest significant differences analysis was  
241 performed on all significant ANOVA results. To facilitate comparison of rock pool  
242 water carbonate chemistry between months and tidal emersion periods, all variables  
243 were summarized using principal components analysis (PCA) with scaled variables,  
244 allowing for transformation of the highly correlated carbonate chemistry variables into  
245 uncorrelated PCs for comparison between independent variables (month and tide).  
246 Differences in carbonate chemistry were thus examined by ANOVA analysis of  
247 principal component one (PC1) separately for daytime and night-time data, as above.

248 Least squares multiple linear regression was used to examine relationships between  
249 daytime PC1 and irradiance (analysed separately as both irradiance measured and  
250 calculated cumulative photodose) and rock pool water temperature. The relative  
251 importance of predictor variables was calculated using the relaimpo package with type  
252 ‘lmg’ (Grömping, 2006). Least squares linear regression was used to examine  
253 relationships between night-time PC1 and rock pool water temperature.

254

255 *Net production, respiration and calcification: NP, R<sub>DAY/NIGHT</sub> and NG rates were*  
256 *analyzed separately for daytime and night-time data using 3-way ANOVA with the*  
257 *factors month, tide and light-treatment, with all interactions. All C. officinalis NP/R and*  
258 *NG data measured across all seasons were plotted as an exponential function P-E of the*  
259 *average ambient irradiance E (μmol photons m<sup>-2</sup> s<sup>-1</sup>) recorded over each incubation*  
260 *experiment, as:*

261

$$262 \quad NP/R (NG) = P_{max}(1 - e^{-E/E_k}) + c$$

263

264 where  $P_{max}$  is the rate of maximum net production (or calcification) ( $\mu\text{mol DIC gDW}^{-1}$   
265  $\text{h}^{-1}$ , or  $\mu\text{mol CaCO}_3 \text{gDW}^{-1} \text{h}^{-1}$ );  $E_k$  is the minimum saturating irradiance ( $\mu\text{mol m}^{-2} \text{s}^{-1}$ );  
266 and  $c$  is the dark respiration rate (or calcification rate) ( $\mu\text{mol DIC/CaCO}_3 \text{gDW}^{-1} \text{h}^{-1}$ ).

267 To examine relationships between  $NP$ ,  $R$  and  $NG$  with water temperature and carbonate  
268 chemistry ( $\text{PC1}_{\text{day/night}}$ ), temperature and  $\text{PC1}$  were added individually into the above  
269 model as linear terms, in addition to construction of a ‘global model’ containing  
270 irradiance as an exponential function, and both water temperature and  $\text{PC1}$  as linear  
271 terms. The goodness-of-fit of the respective models was compared using estimated  $R^2$   
272 and Akaike Information Criterion (AIC), and ANOVA comparisons were performed to

273 test the significance of the inclusion of respective terms into each model. The  
274 relationship between *C. officinalis* NG and NP/R was modeled using non-linear  
275 regression as detailed above.

276

### 277 **3. Results**

#### 278 **3.1. Abiotic environment**

279 Irradiance varied between all sampling months ( $F_{3,32} = 193.385$ ,  $P < 0.0001$ ), being  
280 maximal in July and minimal in December (Fig. 2), with significant change in  
281 irradiance over tidal emersion only apparent in July ( $F_{1,32} = 8.114$ ,  $P < 0.01$ , TukeyHSD  
282  $P < 0.05$ ). Warmest daytime rock pool water temperatures were observed in July, with  
283 the coldest in March, and a significant difference apparent between all sampling months  
284 ( $F_{3,32} = 760.94$ ,  $P < 0.0001$ ) (Fig. 2). Water temperature significantly increased over  
285 daytime tidal emersion during July and September ( $F_{1,32} = 97.48$ ,  $P < 0.0001$ ,  
286 TukeyHSD  $P < 0.05$  in both cases), whereas no change occurred in December or March,  
287 as supported by significant interaction between month and tide ( $F_{3,32} = 37.01$ ,  $P <$   
288  $0.0001$ ). Night-time rock pool water temperatures were greatest in September and  
289 lowest in March, with a significant difference between all sampling months ( $F_{2,13} =$   
290  $168.534$ ,  $P < 0.0001$ ). Over night-time tidal emersion, a significant decrease in water  
291 temperature was apparent during July ( $15.6 \pm 0.16$  to  $14.7 \pm 0.14^\circ\text{C}$ ) and September  
292 ( $16.8 \pm 0.45$  to  $15.7 \pm 0.15^\circ\text{C}$ ) ( $F_{1,13} = 20.049$ ,  $P < 0.01$ , TukeyHSD  $P < 0.05$  in all  
293 cases).

294

295 Changes in rock pool water carbonate chemistry were observed over daytime and night-  
296 time tidal emersion periods during each sampling month (Supplementary Figures 1 &  
297 2). Over daytime emersion,  $p\text{CO}_2$  and  $\text{HCO}_3^-$  decreased, with concomitant increases in

298 pH,  $\text{CO}_3^{2-}$ ,  $\Omega_{\text{arg}}$  and  $\Omega_{\text{cal}}$ . From the start to end of night-time emersion, the opposite  
299 trends were observed, with increases in  $p\text{CO}_2$  and  $\text{HCO}_3^-$  paralleled by decreases in pH  
300 and  $\Omega\text{CO}_3^{2-}$ . Principal components analysis (PCA) served to summarize daytime and  
301 night-time carbonate chemistry parameters for subsequent analyses (Table 2 & Fig. 3),  
302 with  $\text{PC1}_{\text{day}}$  and  $\text{PC1}_{\text{night}}$  describing 84 % and 83 % of the variance in carbonate  
303 chemistry observed over seasonal and tidal time-scales, respectively. For all subsequent  
304 analyses,  $\text{PC1}_{\text{day}}$  and  $\text{PC1}_{\text{night}}$  were taken as representative of carbonate chemistry  
305 dynamics.

306

307  $\text{PC1}_{\text{day}}$  and  $\text{PC1}_{\text{night}}$  were significantly different between sampling months ( $F_{3,67} =$   
308  $27.528$  and  $F_{2,47} = 39.73$ , respectively,  $P < 0.0001$  in both cases, Fig. 4), with higher  
309  $\text{PC1}_{\text{day}}$  observed in July and September in comparison to December and March, and  
310 significantly different  $\text{PC1}_{\text{night}}$  observed between all night-time sampling months  
311 (March, July and September; TukeyHSD,  $P < 0.05$  in all cases).  $\text{PC1}_{\text{day}}$  significantly  
312 increased over daytime tidal emersion, representing decreased DIC,  $p\text{CO}_2$  and  $\text{HCO}_3^-$ ,  
313 and increased pH and  $\Omega\text{CO}_3^{2-}$  parameters, during all sampling months but December  
314 ( $F_{1,67} = 1.912$ ,  $P < 0.0001$ , TukeyHSD  $P < 0.05$  in all cases). Over night-time tidal  
315 emersion the opposite trends were observed, with significant decrease in  $\text{PC1}_{\text{night}}$   
316 apparent during every sampling month, representing increased DIC,  $p\text{CO}_2$  and  $\text{HCO}_3^-$   
317 and consequent decreases in pH and  $\Omega\text{CO}_3^{2-}$  ( $F_{1,47} = 810.90$ ,  $P < 0.0001$ , TukeyHSD  $P$   
318  $< 0.05$  in all cases). The magnitude of change in rock pool water carbonate chemistry  
319 over night-time tidal emersion increased from March to September, as evidenced by  
320 significant interaction between month and tide ( $F_{2,47} = 73.31$ ,  $P < 0.0001$ ).

321

322 Least squares multiple linear regression (Table 3) revealed significant relationships  
323 between PC1<sub>day</sub>, irradiance (28% relative importance) and water temperature (71%  
324 relative importance) ( $R^2 = 0.63$ ,  $P < 0.0001$ ) (Table 3), and between PC1<sub>day</sub>, calculated  
325 cumulative photodose (58% relative importance) and water temperature (41% relative  
326 importance) ( $R^2 = 0.69$ ,  $P < 0.0001$ ). PC1<sub>night</sub> showed a minimal relationship to water  
327 temperature ( $R^2 = 0.08$ ,  $P < 0.05$ ).

328

### 329 **3.2. Net production and respiration**

330 *Corallina officinalis* demonstrated maximal NP (negative DIC flux) in July (start of  
331 emersion =  $25.80 \pm 0.94 \mu\text{mol DIC gDW}^{-1} \text{h}^{-1}$ ), with lowest values recorded during  
332 December and March (end of March emersion =  $1.56 \pm 0.74 \mu\text{mol DIC gDW}^{-1} \text{h}^{-1}$ )  
333 ( $F_{3,69} = 6.838$ ,  $P < 0.001$ ) (Fig. 5). In contrast, no significant difference in *C. officinalis*  
334  $R_{DAY}$  was observed between sampling months (Fig. 5a). Whilst significant changes in  
335 NP and  $R_{DAY}$  were recorded in relation to the factor tide ( $F_{1,69} = 8.684$ ,  $P < 0.01$ ), post-  
336 hoc TukeyHSD did not recover significant differences in either parameter between the  
337 start and end of tidal emersion, within any sampling month. Over night-time tidal  
338 emersion, no significant difference was apparent in  $R_{NIGHT}$  between light treatment or  
339 the start and end of tidal emersion periods, and thus data are pooled for presentation  
340 (Fig. 6a). Across sampling months, a significant increase in *C. officinalis*  $R_{NIGHT}$  was  
341 apparent from March to July and September ( $F_{2,52} = 22.170$ ,  $P < 0.0001$ ), with ca. 4.5-  
342 fold greater  $R_{NIGHT}$  observed during September as compared to March.

343

344 Across all data, NP showed a significant relationship with irradiance ( $R^2 = 0.67$ ,  $P <$   
345  $0.0001$  for all parameters, AIC = 885.64), giving a  $P_{max}$  of  $22.35 \mu\text{mol DIC gDW}^{-1} \text{h}^{-1}$ ,  
346  $E_k$  of  $301 \mu\text{mol photons m}^{-2} \text{s}^{-1}$  and estimated overall respiration rate of  $3.29 \mu\text{mol DIC}$

347  $\text{gDW}^{-1} \text{h}^{-1}$  (Fig. 7a, Table 4). Addition of water temperature and carbonate chemistry  
348 (both individually and together) into the model did not significantly improve the  
349 goodness-of-fit (Table 4). This may be due to correlations between irradiance and water  
350 temperature ( $r = 0.42$ ,  $P < 0.0001$ ), irradiance and PC1 ( $r = 0.19$ ,  $P < 0.05$ ) and  
351 temperature and PC1 ( $r = 0.59$ ,  $P < 0.0001$ ) (data not shown).

352

### 353 **3.3. Calcification**

354 *Corallina officinalis*  $NG_{DAY}$  was greatest during July and September as compared to  
355 December and March ( $F_{3,69} = 16.814$ ,  $P < 0.0001$ , TukeyHSD  $P < 0.05$  in all cases),  
356 with a significant difference between  $NG_{DAY-LIGHT}$  and  $NG_{DAY-DARK}$  apparent in all  
357 sampling months ( $F_{1,69} = 290.075$ ,  $P < 0.0001$ ) (Fig. 5b). Highest  $NG_{DAY-LIGHT}$  ( $4.62 \pm$   
358  $0.45 \mu\text{mol CaCO}_3 \text{gDW}^{-1} \text{h}^{-1}$ ) was recorded at the end of daytime tidal emersion during  
359 July, with lowest  $NG_{DAY-LIGHT}$  ( $1.70 \pm 0.08 \mu\text{mol CaCO}_3 \text{gDW}^{-1} \text{h}^{-1}$ ) recorded at the end  
360 of tidal emersion during December. Both negative (indicating  $\text{CaCO}_3$  dissolution) and  
361 positive (indicating  $\text{CaCO}_3$  precipitation)  $NG_{DAY-DARK}$  values were observed, with  
362 maximal  $\text{CaCO}_3$  dissolution in the dark ( $-0.53 \pm 0.20 \mu\text{mol CaCO}_3 \text{gDW}^{-1} \text{h}^{-1}$ ) at the  
363 start of March daytime tidal emersion and maximal precipitation in the dark ( $2.01 \pm$   
364  $0.35 \mu\text{mol CaCO}_3 \text{gDW}^{-1} \text{h}^{-1}$ ) at the end of September daytime tidal emersion (Figure  
365 5b). Significant differences in  $NG_{DAY}$  observed in relation to tide ( $F_{1,69} = 5.028$ ,  $P <$   
366  $0.05$ ) were confined to increases in  $NG_{DAY-DARK}$  from the start to end of July and  
367 September tidal emersion periods (TukeyHSD  $P < 0.05$  in both cases), with significant  
368 interaction between month and tide ( $F_{3,69} = 5.104$ ,  $P < 0.01$ ). No significant differences  
369 in  $NG_{DAY-LIGHT}$  were observed between the start and end of tidal emersion periods  
370 despite concomitant increases in rock pool water  $\Omega\text{CO}_3^{2-}$ .

371

372 During night-time tidal emersion, there was no significant difference between  $NG_{NIGHT-}$   
373  $LIGHT$  and  $NG_{NIGHT-DARK}$ , or between the start and end of tidal emersion within any  
374 sampling month, and thus data are pooled for presentation (Fig. 6b). Whilst net  $CaCO_3$   
375 dissolution was observed during both March and September night-time tidal emersion,  
376 with maximal dissolution in the latter month (monthly average of  $-0.83 \pm 0.11 \mu\text{mol}$   
377  $CaCO_3 \text{ gDW}^{-1} \text{ h}^{-1}$ ), net  $CaCO_3$  precipitation was apparent across the duration of July  
378 night-time emersion (monthly average of  $0.46 \pm 0.14 \mu\text{mol } CaCO_3 \text{ gDW}^{-1} \text{ h}^{-1}$ ); rates  
379 being significantly different between all sampling months ( $F_{2,52} = 25.50$ ,  $P < 0.0001$ ,  
380 TukeyHSD  $P < 0.05$  in all cases) (Fig. 6b).

381

382 Across all data,  $NG$  showed a significant exponential relationship with ambient  
383 irradiance (estimated  $R^2 = 0.76$ ,  $P < 0.0001$  for all parameters, AIC = 383.17), providing  
384 a  $NG_{max}$  of  $4.41 \mu\text{mol } CaCO_3 \text{ gDW}^{-1} \text{ h}^{-1}$ , and an  $E_k$  of  $201 \mu\text{mol photons m}^{-2} \text{ s}^{-1}$  (Fig.  
385 7b, Table 4). Addition of water temperature and/or carbonate chemistry (as PC1)  
386 increased the goodness-of-fit (estimated  $R^2$  and AIC) of the models to  $NG$  data (Table  
387 4). The best representation of  $NG$  was provided by the ‘global model’ including  
388 irradiance as exponential term, and both water temperature and carbonate chemistry as  
389 linear terms (estimated  $R^2 = 0.80$ ,  $P < 0.05$  for all parameters, AIC = 360.57), providing  
390 a  $NG_{max}$  of  $3.94 \mu\text{mol } CaCO_3 \text{ gDW}^{-1} \text{ h}^{-1}$ , and an  $E_k$  of  $113 \mu\text{mol photons m}^{-2} \text{ s}^{-1}$  (Table  
391 4). ANOVA comparison demonstrated all  $NG$  models to be significantly different to  
392 one another (data not shown). Across all data, a significant relationship was also  
393 identified between  $NG$  and  $NP/R$  ( $R^2 = 0.65$ ,  $P < 0.05$  for all parameters,  $n = 140$ ) (Fig.  
394 8).

#### 395 **4. Discussion**



396 Through the pairing of physiological and environmental monitoring, this study has  
397 constrained the regulation of key physiological processes of a coralline alga by  
398 irradiance, water temperature and carbonate chemistry. It is fundamental to understand  
399 the interactions of coralline algae with their environment, given the continuing  
400 perturbation of key abiotic stressors by climate change and ocean acidification. The  
401 findings presented here are discussed in regards to the ecophysiology of *Corallina*  
402 *officinalis* and coralline algae in general, within the larger perspective of global change.

403

#### 404 **4.1. Production and respiration**

405 This study highlights significant seasonality in *C. officinalis* net production that follows  
406 dynamics in irradiance, water temperature and carbonate chemistry. In marine  
407 macrophytes, photosynthetic capacity is generally greatest during months when  
408 irradiance and temperature are highest (Lüning, 1990; Cabello-Pasini and Alberte,  
409 1997). Consistent with previous accounts for other calcifying macroalgae (e.g. Martin  
410 et al., 2006; 2007; Egilisdottir et al., 2015), *C. officinalis* net production was maximal  
411 during July and minimal in December, showing a significant exponential relationship  
412 with irradiance ( $R^2 = 0.67$ ). At saturating levels of irradiance, the enzymatic reactions  
413 that limit photosynthesis are, however, temperature dependent (Lüning, 1990). The  
414 light-saturation coefficient ( $E_k$ ) determined by the present study (ca. 300  $\mu\text{mol photons}$   
415  $\text{m}^{-2} \text{s}^{-1}$  ambient irradiance) highlighted that *C. officinalis* photosynthesis was light-  
416 saturated for the majority of the annual cycle; ambient irradiance  $> E_k$  was recorded in  
417 every sampling month other than December, consistent with the findings of Williamson  
418 et al. (2014a). Thus maximal rates of *C. officinalis* production were likely temperature-  
419 dependent, as is known for other intertidal macroalgae (Kanwisher, 1966).

420

421 Strong seasonality was also identified in *C. officinalis* dark respiration determined  
422 during night-time incubations, in line with accounts for other coralline algae (e.g.  
423 Martin et al., 2006; Egilsdottir et al., 2015). The ca. 4.5-fold increase observed in night-  
424 time respiration from March to September is within the range reported for the maerl-  
425 forming species, *Lithothamnion coralloides*, which demonstrated a 3-fold increase in  
426 respiration during summer months (Martin et al., 2006), and the closely related  
427 geniculate species, *Ellisolandia elongata*, which demonstrated a 10-fold summer  
428 increase in respiration (Egilsdottir et al., 2015). Whilst night-time respiration rates  
429 determined here for *C. officinalis* (ca 1 – 4.5  $\mu\text{mol DIC gDW}^{-1} \text{h}^{-1}$ ) fall within the lower  
430 end of the range reported for *E. elongata* from similar habitats (ca. 0.4 - 17  $\mu\text{mol CO}_2$   
431  $\text{gDW}^{-1} \text{h}^{-1}$ ), Egilsdottir et al. (2015) note that their high summer rates were likely driven  
432 by high water temperatures during summer measurements (23°C as compared to 16°C  
433 during the present study).

434

435 Consistent with observations made in *E. elongata* dominated habitats (Bensoussan and  
436 Gattuso, 2007), *C. officinalis* demonstrated increased rates of daytime respiration as  
437 compared to night-time, with 6-fold greater daytime rates during March, and 1.1-times  
438 greater rates during July and September. Previously, Bensoussan and Gattuso (2007)  
439 observed large variations in winter respiratory activity under both daylight and dark  
440 conditions in assemblages dominated by *E. elongata*, with significantly higher  
441 respiration during the afternoon and first part of the night. Such diurnal variations are  
442 reflected by our findings, with maximal daytime respiration decreasing to lower levels  
443 across night-time emersion. Our data further demonstrated that seasonality in  
444 respiration was better reflected by night-time incubations, whereas no seasonal patterns  
445 were apparent in daytime rates. This is likely due to the influence of residual biological

446 activity after passage from light to dark conditions, given differences in the photo-  
447 history of day and night incubated *C. officinalis*. Daytime samples were collected from  
448 100% ambient irradiance and immediately transferred to complete darkness, whereas  
449 night-time samples had been in darkness for a number of hours prior to incubations.  
450 Future assessments may benefit from use of, for example, the Kok method for  
451 determination of light respiration rates, as applied by Zou et al. (2011) to several  
452 macroalgal species.

453

454 Differences between light and dark respiration rates have direct consequences for the  
455 conventional calculation of gross production ( $GP = \text{net production} + \text{respiration}$ )  
456 (Bensoussan and Gattuso, 2007), although estimates can be made for *C. officinalis*  
457 using our data. Net production recorded at the start of tidal emersion ranged seasonally  
458 from ca. 11 (December) to 26 (July)  $\mu\text{mol DIC gDW}^{-1} \text{ h}^{-1}$ . Assuming our lower,  
459 seasonally variable night-time rates of respiration to be representative, *C. officinalis*  $GP$   
460 is estimated as ranging 15.9 (March) to 27.7 (July)  $\mu\text{mol DIC gDW}^{-1} \text{ h}^{-1}$ ; though  
461 December data are omitted due to the absence of night-time incubations. Similarly,  
462 correcting net production with daytime respiration rates reveals a  $GP$  range of 16.7  
463 (December) to 27.8 (July)  $\mu\text{mol DIC gDW}^{-1} \text{ h}^{-1}$  for *C. officinalis*. These estimates are  
464 highly comparable to  $GP$  reported for *E. elongata* from NW France during winter ( $11.8$   
465  $\pm 1.6 \mu\text{mol C gDW}^{-1} \text{ h}^{-1}$ ) and summer ( $22.5 \pm 1.9 \mu\text{mol C gDW}^{-1} \text{ h}^{-1}$ ) (Egilsdottir et al.,  
466 2015), and serve to highlight the high productivity of geniculate corallines in  
467 comparison to other calcified algal groups. For example, Martin et al. (2006) reported  
468 a seasonal range of 0.68 to 1.48  $\mu\text{mol C gDW}^{-1} \text{ h}^{-1}$  for the maerl forming *Liththamnion*  
469 *coralloides* off NW France. Currently, the contribution of coralline algae to global  
470 carbon cycles is not well constrained, particularly that of geniculate turfing species (El

471 Haïkali et al., 2004; Van der Heijden and Kamenos, 2015). Given their comparatively  
472 high production identified here, our data indicate that geniculate corallines likely play  
473 a significant role in coastal carbon cycling, despite their presumably reduced overall  
474 benthic coverage as compared to maerl-forming or crustose coralline algal species.  
475 Inclusion of geniculate corallines into future estimates of coastal carbon cycles is  
476 therefore essential.

477

478 Over tidal emersion periods, patterns in *C. officinalis* production demonstrate the  
479 inorganic carbon ( $C_i$ ) acquisition ability of this calcified alga over a range of  $\text{CO}_2$  and  
480  $\text{HCO}_3^-$  concentrations, however findings indicate potential vulnerability to periods of  
481 low irradiance e.g. winter. Maintenance of net production over July and September  
482 daytime tidal emersion, despite decreases in rock pool  $p\text{CO}_2$  of 84% and 39%,  
483 respectively, highlight the ability of *C. officinalis* to effectively utilize both  $\text{CO}_2$  and  
484  $\text{HCO}_3^-$  as substrates for photosynthesis, as previously noted (Cornwall et al., 2012).  
485 This allows access to the relatively high  $\text{HCO}_3^-$  concentrations in seawater when  $\text{CO}_2$   
486 diffusion is limiting (Koch et al., 2013). During December and March, however, when  
487 overall minimal irradiance prevailed, a decrease in *C. officinalis* net production was  
488 observed. Estimation of  $GP/R$  ratios for these emersion periods (using daytime  
489 respiration data) revealed decreases from 3.45 to 1.9 over December-, and 3.93 to 1.2  
490 over March- daytime emersion. Thus decreases in net production were driven by  
491 decreases in photosynthesis relative to respiration, which approached unity by the end  
492 of emersion in winter months. This reflects ecosystem wide  $GP/R$  ratios for  
493 assemblages dominated by *E. elongata* in the NW Mediterranean, which remained close  
494 to 1 ( $1.1 \pm 0.1$ ) over 24 h periods during winter (Bensoussan and Gattuso, 2007).  
495 Although neither water temperature, nor irradiance, showed significant change over

496 December or March tidal emersion, reductions in photosynthesis may have been driven  
497 by inorganic carbon limitation due to seasonal minima in irradiance. Under low light  
498 conditions, the ability to utilize  $\text{HCO}_3^-$  can be energetically limited, increasing reliance  
499 on  $\text{CO}_2$  diffusion (Koch et al., 2013). *C. officinalis* photosynthesis may thus have been  
500 sensitive to the relatively small decrease in rock pool  $p\text{CO}_2$  (ca. 30%) that occurred  
501 over December and March emersion periods.

502

#### 503 **4.2. Calcification**

504 This study demonstrates that *C. officinalis* calcification is highly influenced by seasonal  
505 and diurnal variability in other metabolic processes (photosynthesis and respiration), in  
506 addition to the external carbonate chemistry environment. Across the entire annual  
507 cycle, *C. officinalis* calcification was highly predictable ( $R^2 = 0.80$ ) by irradiance, water  
508 temperature and carbonate chemistry, providing a calculated  $NG_{max}$  of  $3.94 \mu\text{mol}$   
509  $\text{CaCO}_3 \text{ gDW}^{-1} \text{ h}^{-1}$  and an  $E_k$  of  $113.45 \mu\text{mol photons m}^{-2} \text{ s}^{-1}$ . Irradiance was the greatest  
510 predictor of calcification (accounting for 76% of variability), reflecting photosynthetic  
511 enhancement of  $\text{CaCO}_3$  precipitation (see below), although by contrasting light and  
512 dark calcification dynamics, the variable influences of physiology and external  
513 environment have been determined.

514

515 Light-enhanced calcification, i.e.  $\text{CaCO}_3$  precipitation, was observed across the entire  
516 seasonal cycle, with maximal light-calcification rates during July and September in  
517 comparison to December and March. The seasonal range of net light-calcification was  
518 significantly higher than reported for the maerl species *L. corallioides* (Martin et al.,  
519 2006), comparable to *E. elongata* from NW France (Egilsdottir et al., 2015), and lower  
520 than reported for *E. elongata* from the Mediterranean (El Haikali et al., 2004). Light-

521 enhanced calcification is typical for calcifying macroalgae, and is a product of light-  
522 dependent increase in carbonate saturation ( $\Omega\text{CO}_3^{2-}$ ) at the sites of calcification, due to  
523 photosynthetic activity (Littler, 1976; Koch et al., 2013). In the Corallinales,  
524 calcification takes place in the cell wall, from which  $\text{CO}_2$  (and potentially  $\text{HCO}_3^-$ )  
525 uptake by adjacent cells for photosynthesis increases the pH, shifting the carbonate  
526 equilibrium in favour of  $\Omega\text{CO}_3^{2-}$  and  $\text{CaCO}_3$  precipitation (Littler, 1976; Borowitzka,  
527 1982; Koch et al., 2013). Photosynthetic enhancement of *C. officinalis* calcification  
528 during the present study is strongly supported by the significant relationship identified  
529 between the two processes ( $R^2 = 0.65$ ), as was also observed by Pentecost (1978).  
530 Interestingly, our data further demonstrated that internal enhancement of  $\Omega\text{CO}_3^{2-}$  at the  
531 site of calcification, as opposed to external  $\Omega\text{CO}_3^{2-}$ , was the dominant control on light-  
532 calcification rates. This was evidenced by a lack of increase in light calcification rates  
533 over summer tidal emersion periods, despite significant increases in rock pool pH and  
534  $\Omega\text{CO}_3^{2-}$ . With decreases in net production over daytime tidal emersion, e.g. during  
535 March, minimal levels of production were sufficient to maintain increased internal  
536  $\Omega\text{CO}_3^{2-}$ , permitting maintenance of calcification. This is supported by the overall lower  
537  $E_k$  determined for calcification (ca.  $110 \mu\text{mol photons m}^{-2} \text{ s}^{-1}$ ) as compared to net  
538 production (ca.  $300 \mu\text{mol photons m}^{-2} \text{ s}^{-1}$ ).

539

540 In contrast to light calcification, the direction of *C. officinalis* dark calcification  
541 (dissolution vs. precipitation) was strongly related to rock pool water  $\Omega\text{CO}_3^{2-}$ ,  
542 mimicking abiotic  $\text{CaCO}_3$  precipitation dynamics (Millero, 2007; Ries 2009). During  
543 seasonal minima of  $\Omega\text{CO}_3^{2-}$ , net dissolution of  $\text{CaCO}_3$  was apparent across dark daytime  
544 (December) and night-time (March) incubations, as observed during winter for *E.*  
545 *elongata* (Egilsdottir et al., 2015). With increases in pH and  $\Omega\text{CO}_3^{2-}$  over March, July

546 and September daytime tidal emersion, initially negative (indicating net dissolution) or  
547 low positive dark calcification rates increased significantly, indicating net CaCO<sub>3</sub>  
548 precipitation at levels 40 – 46 % of light calcification. Additionally, net CaCO<sub>3</sub>  
549 precipitation was recorded across all dark daytime and night-time incubations during  
550 July, coinciding with seasonal maxima in  $\Omega\text{CO}_3^{2-}$ . CaCO<sub>3</sub> precipitation in the dark has  
551 previously been documented for calcifying macroalgae (e.g. Pentecost, 1978;  
552 Borowitzka, 1981; Gao et al., 1993; Lee and Carpenter, 2001; de Beer and Larkum,  
553 2001; Martin et al., 2006), typically at lower rates (e.g. 10 – 40 %) than light  
554 calcification (Pentecost, 1978; Borowitzka, 1981), and has been attributed to belated  
555 biological activity after a passage from light to dark conditions (Pentecost, 1978; Martin  
556 et al., 2006). Our findings demonstrate that dark calcification is possible over complete  
557 diurnal cycles for *C. officinalis*, and can be significantly exaggerated under conditions  
558 of rock pool water CO<sub>3</sub><sup>2-</sup>-super-saturation. This mechanism can, however, be  
559 overridden by enhanced respiration. At the level of the organism, respiration can  
560 promote CaCO<sub>3</sub> dissolution via internal generation of CO<sub>2</sub> (Koch et al., 2013). During  
561 September, when maximal night-time respiration was observed, net CaCO<sub>3</sub> dissolution  
562 was apparent over the duration of night-time emersion, despite seasonal highs in  
563  $\Omega\text{CO}_3^{2-}$ . Dissolution pressures can thus be exacerbated by high rates of respiration,  
564 mitigating the positive impacts of maxima in external  $\Omega\text{CO}_3^{2-}$ . This may have  
565 significant ramifications for the future fate of coralline algae if increases in water  
566 temperature drive corresponding increases in respiration.

567

## 568 **Conclusions**

569 Our findings indicate that *Corallina* species are highly tolerant to environmental stress,  
570 and are well-adapted to intertidal habitats, in agreement with previous studies

571 (Williamson et al., 2014; Guenther and Martone, 2014). Photosynthesis, respiration and  
572 calcification varied significantly with abiotic stressors, and strongly interacted with one  
573 another to produce predominantly beneficial outcomes at the level of the organism.  
574 With predicted acidification and warming of the world's oceans, the balance between  
575 these processes and the external environment may be perturbed. Whilst acidification  
576 may relieve putative CO<sub>2</sub> limitation in rock pools during low irradiance winter months,  
577 increases in night-time dissolution are predicted given the strong coupling between  
578 carbonate chemistry and dark calcification dynamics identified here. Similarly, whilst  
579 increasing temperatures may facilitate increases in gross productivity, temperature  
580 driven increases in night-time respiration could further exacerbate dark dissolution by  
581 reducing carbonate saturation at the sites of calcification. *Corallina officinalis* will be  
582 most vulnerable to future change during winter months, and monitoring to assess  
583 impacts should be focused on such periods. This study adds to the growing  
584 understanding of coralline algal physiology, and provides a baseline against which to  
585 monitor future change.

586  
587

#### Acknowledgements

588 This work was funded by the NERC grant (NE/H025677/1).

589

590

#### References

591 Bensoussan, N. and Gattuso, J-P.: Community primary production and calcification in  
592 a NW Mediterranean ecosystem dominated by calcareous macroalgae, Mar. Ecol. Prog.  
593 Ser., 334, 37–45, 2007.

594

595 Borowitzka, M.A.: Photosynthesis and calcification in the articulated coralline red  
596 algae *Amphiroa anceps* and *A. foliacea*, Mar. Biol., 62, 17–23, 1981.

597

598 Borowitzka, M.A.: Morphological and cytological aspects of algal calcification, Int.  
599 Rev. Cytol. Surv. Cell Biol., 74, 127–162, 1982.

600



601 Breeman, A.M.: Relative importance of temperature and other factors in determining  
602 geographic boundaries of seaweeds - experimental and phenological evidence.  
603 Helgolander Meeresuntersuchungen 42:199–241, 1988.  
604

605 Brodie, J., Williamson, C., Barker, G.L., Walker, R.H., Briscoe, A., and Yallop, M.:  
606 Characterising the microbiome of *Corallina officinalis*, a dominant calcified intertidal  
607 red alga, FEMS Micro. Ecol., 92(8), doi: 10.1093/femsec/fiw110, 2016.  
608

609 Brodie, J., Williamson, C.J., Smale, D.A. et al.: The future of the north-east Atlantic  
610 benthic flora in a high CO<sub>2</sub> world, Ecology and Evolution, 4(13), 2787–2798, 2014.  
611

612 Cabello-Pasini, A. and Alberte, R.S.: Seasonal patterns of photosynthesis and light-  
613 independent carbon fixation in marine macrophytes, J. Phycol., 33, 321–329, 1997.  
614

615 Chisholm, J.R.M. and Gattuso, J.P.: Validation of the alkalinity anomaly technique for  
616 investigating calcification and photosynthesis in coral-reef communities, Limnol.  
617 Oceanogr., 36, 1232–1239, 1991.  
618

619 Cornwall, C.E., Hepburn, C.D., Pritchard, D., Currie, K.I., McGraw, C.M., Hunter,  
620 K.A. and Hurd, C.L.: Carbon-use strategies in macroalgae: differential responses to  
621 lowered pH and implications for ocean acidification, J. Phycol., 48, 137–144, 2012.  
622

623 Coull, B.C. and Wells, J.B.J.: Refuges from fish predation - experiments with phytal  
624 meiofauna from the New Zealand rocky intertidal, Ecology, 64, 1599–1609, 1983.  
625

626 De Beer, D. and Larkum, A.W.D.: Photosynthesis and calcification in the calcifying  
627 algae *Halimeda discoidea* studied with microsensors, Plant Cell Environ., 24, 1209–  
628 1217, 2001.  
629

630 Dickson, A.G. and Millero, F.J.: A comparison of the equilibrium constants for the  
631 dissociation of carbonic acid in seawater media. Deep Sea Res. Part A Oceanogr. Res.  
632 Pap., 34, 1733–1743, 1987.  
633

634 Egilsdottir, H., Olafsson, J. and Martin, S.: Photosynthesis and calcification in the  
635 articulated coralline alga *Ellisolandia elongata* (Corallinales, Rhodophyta) from  
636 intertidal rock pools, Eur. J. Phycol., 51(1), 59–70, 2015.  
637

638 Egilsdottir, H., Noisette, F., Noël, L.M-L.J., Olafsson, J. and Martin, S.: Effects of  
639 pCO<sub>2</sub> on physiology and skeletal mineralogy in a tidal pool coralline alga *Corallina*  
640 *elongate*, Mar. Biol., 160, 2103–2112, 2013.  
641

642 El Haïkali, B., Bensoussan, N., Romano, J. and Bousquet, V.: Estimation of  
643 photosynthesis and calcification rates of *Corallina elongata* Ellis and Solander ,1786,  
644 by measurements of dissolved oxygen, pH and total alkalinity, Sci. Mar., 68, 45–56,  
645 2004.  
646

647 Ganning, B.: Studies on chemical, physical and biological conditions in Swedish  
648 rockpool ecosystems, Ophelia, 9, 51–105, 1971.  
649

650 Gao, K., Aruga, Y., Asada, K., Ishihara, T., Akano, T. and Kiyohara, M.: Calcification  
651 in the articulated coralline alga *Corallina pilulifera*, with special reference to the effect  
652 of elevated CO<sub>2</sub> concentration, *Mar. Biol.*, 117, 129–132, 1993.  
653  
654 Grömping, U.: Relative Importance for linear regression in R: The Package relaimpo,  
655 *J. Stat. Softw.*, 17, 1–27, 2006.  
656  
657 Guenther, R.J. and Martone, P.T.: Physiological performance of intertidal coralline  
658 algae during a simulated tidal cycle, *J. Phycol.*, 50, 310–321, 2014.  
659  
660 Hofmann, L. and Bischof, K.: Ocean acidification effects on calcifying macroalgae,  
661 *Aquat. Biol.*, 22, 261–279, 2014.  
662  
663 Hofmann, L., Straub, S. and Bischof, K.: Competition between calcifying and  
664 noncalcifying temperate marine macroalgae under elevated CO<sub>2</sub> levels, *Mar. Ecol.*  
665 *Prog. Ser.*, 464, 89–105, 2012a.  
666  
667 Hofmann, L., Yildiz, G., Hanelt, D. and Bischof, K.: Physiological responses of the  
668 calcifying rhodophyte, *Corallina officinalis* (L.), to future CO<sub>2</sub> levels, *Mar. Biol.* 159,  
669 783–792, 2012b.  
670  
671 Israel, A. and Hophy, M.: Growth, photosynthetic properties and Rubisco activities  
672 and amounts of marine macroalgae grown under current and elevated seawater CO<sub>2</sub>  
673 concentrations. *Glob Chang Biol* 8:831–840, 2002.  
674  
675 Johansen, H.W.: *Coralline Algae: A first synthesis*. CRC Press, Boca Raton, Florida,  
676 USA. p239, 1981.  
677  
678 Johnston, A.M., Maberly, S.C. and Raven, J.A.: The acquisition of inorganic carbon  
679 by four red macroalgae. *Oecologia* 92:317–326, 1992.  
680  
681 Jones, C.G., Lawton, J.H. and Shachak, M.: Organisms as ecosystem engineers, *Oikos*,  
682 69, 373–386, 1994.  
683  
684 Jokiel, P.L.: Ocean acidification and control of reef coral calcification by  
685 boundary layer limitation of proton flux. *Bull Mar Sci* 87:639–657, 2011.  
686  
687 Jueterbock, A., Tyberghein, L., Verbruggen, H., Coyer, J.A., Olsen, J.L. and Hoarau,  
688 G.: Climate change impact on seaweed meadow distribution in the North Atlantic  
689 rocky intertidal. *Ecol Evol* 3:1356–73, 2013.  
690  
691 Kanwisher, J.: Photosynthesis and respiration in some seaweeds. In: Barnes H (ed)  
692 *Some Contemporary Studies in Marine Science*. George Allen and Unwin LTD,  
693 London. pp407–420, 1966.  
694  
695 Kelaher, B.P.: Influence of physical characteristics of coralline turf on associated  
696 macrofaunal assemblages, *Mar. Ecol. Prog. Ser.*, 232, 141–148, 2002.  
697  
698 Kelaher, B.P.: Changes in habitat complexity negatively affect diverse gastropod  
699 assemblages in coralline algal turf, *Oecologia*, 135, 431–441, 2003.

700  
701 Koch, M., Bowes, G., Ross, C. and Zhang, X-H.: Climate change and ocean  
702 acidification effects on seagrasses and marine macroalgae, *Glob. Chang. Biol.*, 19, 103–  
703 32, 2013.  
704  
705 Lee, D. and Carpenter, S.J.: Isotopic disequilibrium in marine calcareous algae, *Chem.*  
706 *Geol.*, 172, 307–329, 2001.  
707  
708 Littler, M.: Calcification and its role among the macroalgae, *Micronesica*, 12(1), 27–  
709 41, 1976.  
710  
711 Littler, M., Littler, D.S., Blair, S.M. and Norris, J.N.: Deepest known plant life  
712 discovered on an uncharted seamount, *Science*, 227, 57–59, 1985.  
713  
714 Lüning, K.: *Seaweeds: their environment, biogeography and ecophysiology*, John  
715 Wiley & Sons, New York, NY, USA, 1990.  
716  
717 Martin, S., Castets, M.D. and Clavier, J.: Primary production, respiration and  
718 calcification of the temperate free-living coralline alga *Lithothamnion corallioides*,  
719 *Aquat. Bot.*, 85, 121–128, 2006.  
720  
721 Martin, S., Clavier, J., Chauvaud, L. and Thouzeau, G.: Community metabolism in  
722 temperate maerl beds. I. Carbon and carbonate fluxes, *Mar. Ecol. Prog. Ser.*, 335, 19–  
723 29, 2007.  
724  
725 Martin, S. and Gattuso, J-P.: Response of Mediterranean coralline algae to ocean  
726 acidification and elevated temperature, *Glob. Chang. Biol.*, 15, 2089–2100, 2009.  
727  
728 Maberly, S.C.: Exogenous sources of inorganic carbon for photosynthesis by marine  
729 macroalgae. *J Phycol* 26:439–449, 1990.  
730  
731 McCoy, S. and Kamenos, N.A.: Coralline algae (Rhodophyta) in a changing world:  
732 integrating ecological, physiological, and geochemical responses to global change, *J.*  
733 *Phycol.*, DOI: 10.1111/jpy.12262, 2015.  
734  
735 Mehrbach, C., Culbertson, C.H., Hawley, J.E. and Pytkowicz, R.M.: Measurement of  
736 the apparent dissociation constants of carbonic acid in seawater at atmospheric  
737 pressure, *Limnol. Oceanogr.*, 18, 897–907, 1973.  
738  
739 Millero, F.J.: The marine inorganic carbon cycle, *Chem. Rev.*, 107, 308–341, 2007.  
740  
741 Morris, S. and Taylor, A.C.: Diurnal and seasonal-variation in physicochemical  
742 conditions within intertidal rock pools, *Estuar. Coast Shelf Sci.*, 17, 339–355, 1983.  
743  
744 Nelson, W.A.: Calcified macroalgae - critical to coastal ecosystems and vulnerable to  
745 change: a review, *Mar. Freshw. Res.*, 60, 787, 2009.  
746  
747 Perkins, R.G., Williamson, C.J., Brodie, J., Barille, L., Launeau, P., Lavaud, J., Yallop,  
748 M.L. and Jesus, B.: Microspatial variability in community structure and  
749 photophysiology of calcified macroalgal microbiomes revealed by coupling of

750 hyperspectral and high-resolution fluorescence imaging, *Scientific Reports*, 6, 22343,  
751 2016.

752

753 Pentecost, A.: Calcification and photosynthesis in *Corallina officinalis* L. using CO<sub>2</sub> C-  
754 14 method, *Br. Phycol. J.*, 13, 383–390, 1978.

755

756 Pierrot, D., Lewis, E. and Wallace, D.W.R.: MS Excel program developed for CO<sub>2</sub>  
757 system calculations, Tech. rep., Carbon Dioxide Inf. Anal. Cent., Oak Ridge Natl. Lab,  
758 US DOE, Oak Ridge, Tennessee, 2016.

759

760 R Core Team: *R: A Language and Environment for Statistical Computing*, 2014.

761

762 Ries, J.B.: Effects of secular variation in seawater Mg/Ca ratio (calcite-aragonite seas)  
763 on CaCO<sub>3</sub> sediment production by the calcareous algae *Halimeda*, *Penicillus* and  
764 *Udotea* - evidence from recent experiments and the geological record, *Terra. Nov.*, 21,  
765 323–339, 2009.

766

767 Ries, J.B.: A physicochemical framework for interpreting the biological calcification  
768 response to CO<sub>2</sub>-induced ocean acidification. *Geochim. Cosmochim. Acta.* 75:4053–  
769 4064, 2011.

770

771 Smith, S. and Key, G.: Carbon dioxide and metabolism in marine environments,  
772 *Limnol. Oceanogr.*, 20, 493–495, 1975.

773

774 Van der Heijden, L.H. and Kamenos, N.A.: Calculating the global contribution of  
775 coralline algae to total carbon burial, *Biogeosciences*, 12, 6429–6441, 2015.

776

777 Venables, W.N. and Ripley, B.D.: *Modern Applied Statistics with S*, Fourth. Springer,  
778 New York, 2002.

779

780 Williamson, C.J., Brodie, J., Goss, B., Yallop, M., Lee, S. and Perkins, R.: *Corallina*  
781 and *Ellisolandia* (Corallinales, Rhodophyta) photophysiology over daylight tidal  
782 emersion: interactions with irradiance, temperature and carbonate chemistry, *Mar.*  
783 *Biol.*, 161, 2051–2068, 2014a.

784

785 Williamson, C.J., Najorka, J., Perkins, R., Yallop, M.L. and Brodie, J.: Skeletal  
786 mineralogy of geniculate corallines: providing context for climate change and ocean  
787 acidification research, *Mar. Ecol. Prog. Ser.*, 513, 71–84, 2014b.

788

789 Williamson, C.J., Walker, R.H., Robba, L., Russell, S., Irvine, L.M. and Brodie, J.:  
790 Towards resolution of species diversity and distribution in the calcified red algal genera  
791 *Corallina* and *Ellisolandia* (Corallinales, Rhodophyta), *Phycologia*, 54(1), 2–11, 2015.

792

793 Zou, D., Kunshan, G.A.O. and Jianrong, X.I.A.: Dark respiration in the light and in  
794 darkness of three marine macroalgal species grown under ambient and elevated CO<sub>2</sub>  
795 concentrations, *Acta. Oceanol. Sin.*, 30(1), 106–112, 2011.

796

797

798

799

## Figures

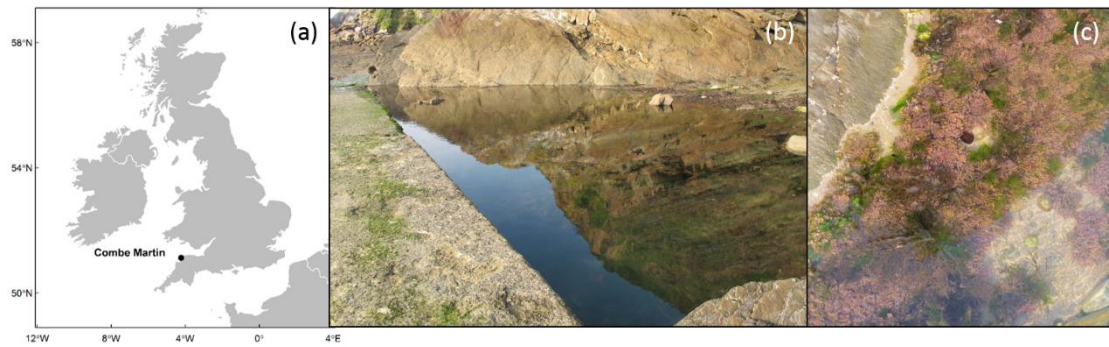

800

801 **Figure 1.** Sampling site and habitat, showing location of Combe Martin (a), and an

802 example upper-shore rock pool (b) dominated by turfing assemblages of *Corallina*

803 *officinalis* (c).

804

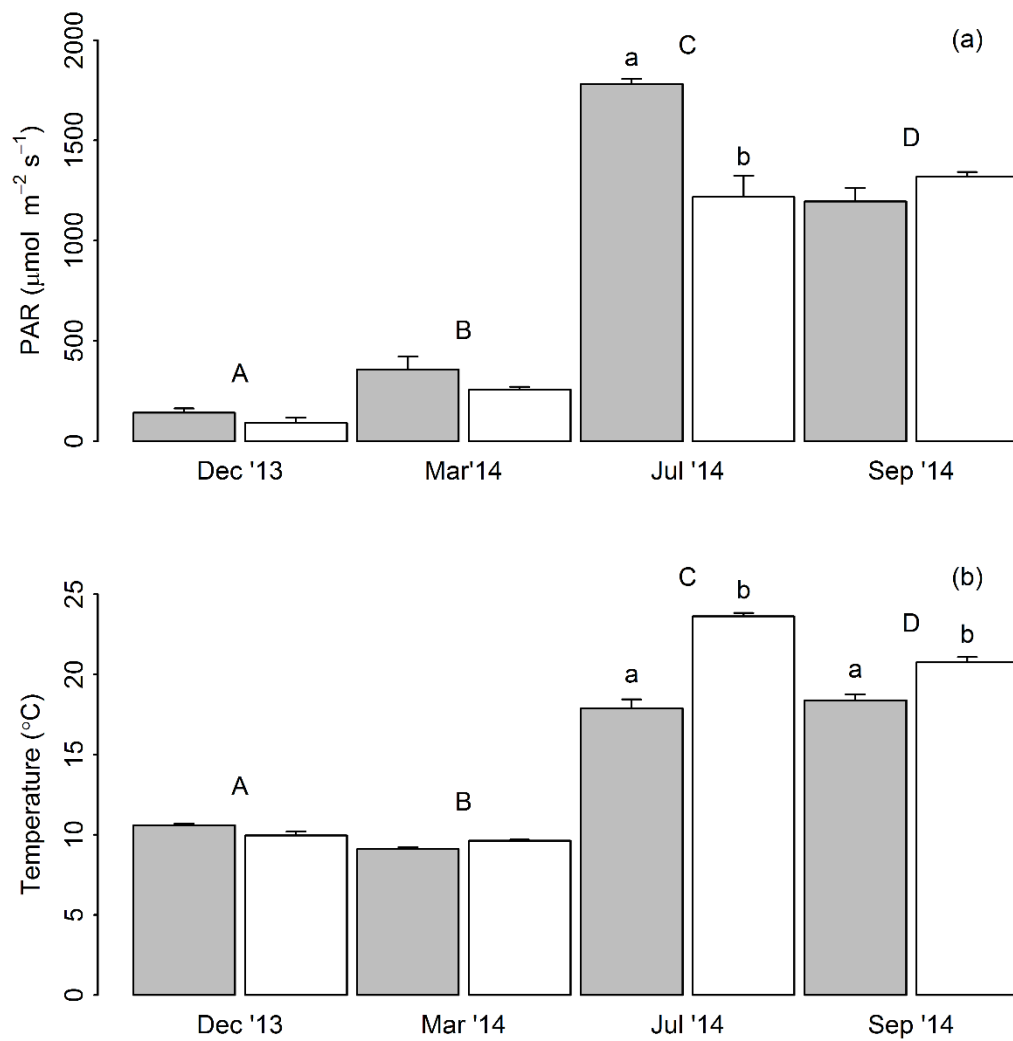

805

806 **Figure 2:** Irradiance (a) and rock pool water temperature (b) recorded at the start (grey  
 807 bars) and end (white bars) of daytime tidal emersion periods during December 2013  
 808 (Dec '13), and March (Mar '14), July (Jul'14) and September (Sep '14) 2014 (Average  
 809  $\pm$  SE). Upper-case and lower-case letters denote TukeyHSD homogenous subsets in  
 810 relation to the factors 'month' and 'tide', respectively.

811

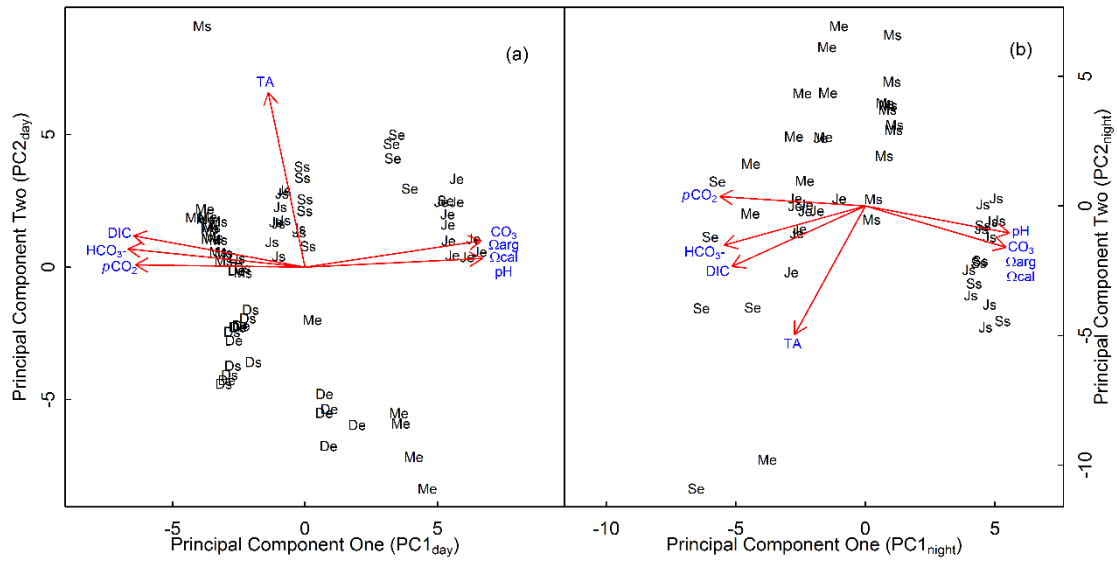

812  
 813 **Figure 3:** Principal components analysis of (a) daytime and (b) night-time carbonate  
 814 chemistry parameters, showing principal component one in relation to principal  
 815 component two. Upper-case letters indicate sampling month (D = December, M =  
 816 March, J = July, S = September) and lower-case letters indicate start (s) or end (e) tidal  
 817 emersion.

818

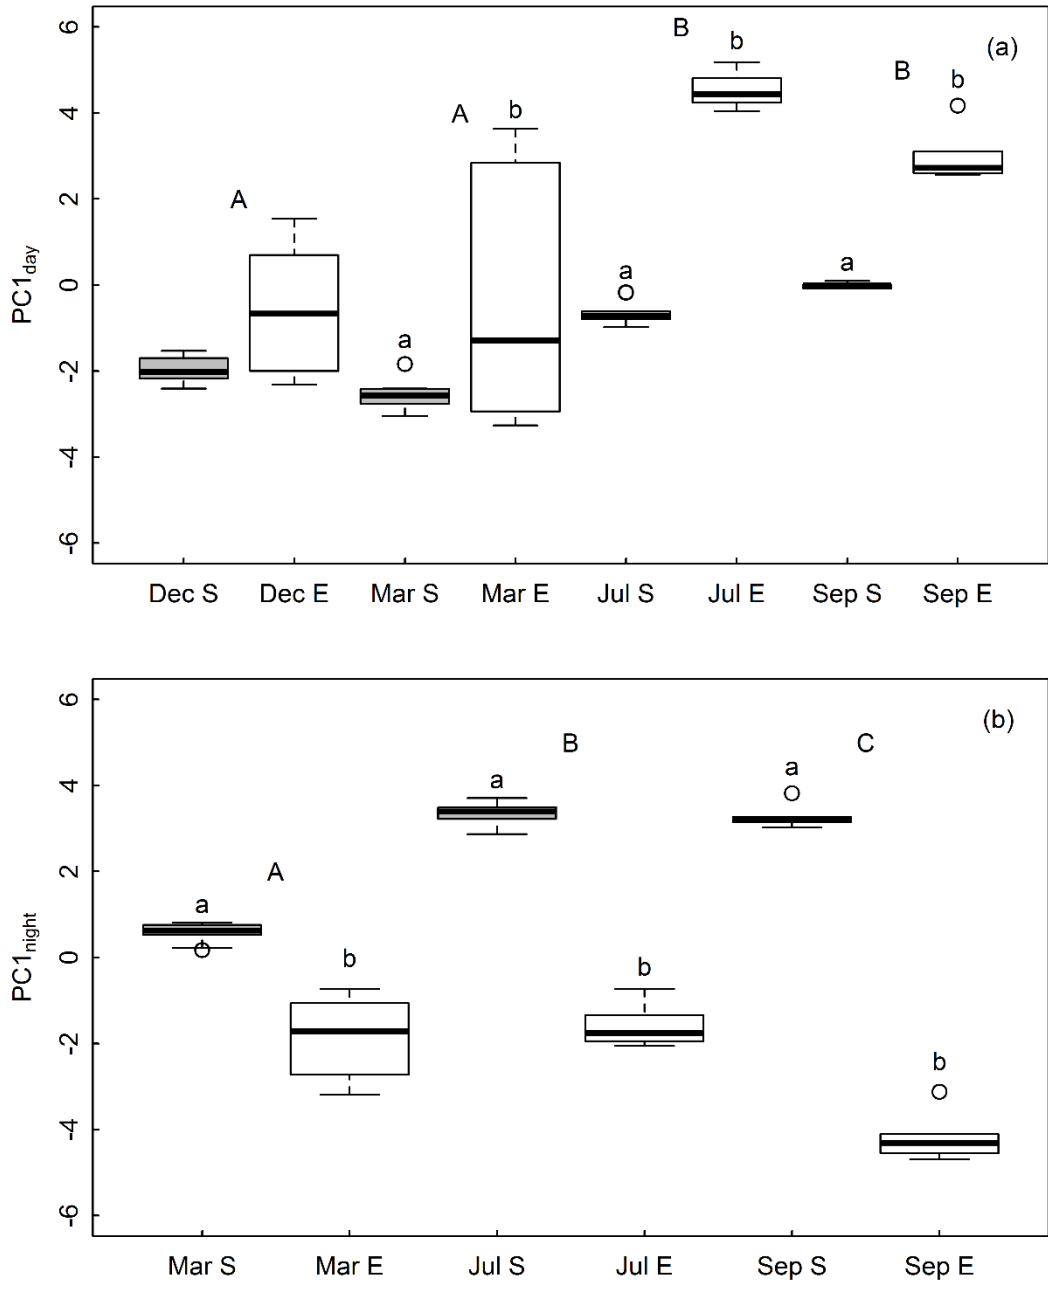

819

820 **Figure 4:** Boxplots showing the median, minimum, maximum and first and third  
 821 quartiles of PC1<sub>day</sub> (a) and PC1<sub>night</sub> (b) in relation to sampling month (Dec = December,  
 822 Mar = March, Jul = July, Sep = September) and tidal emersion period (S = start, E =  
 823 End). Upper-case and lower-case letters denote TukeyHSD homogenous subsets in  
 824 relation to the factors 'month' and 'tide', respectively.

825



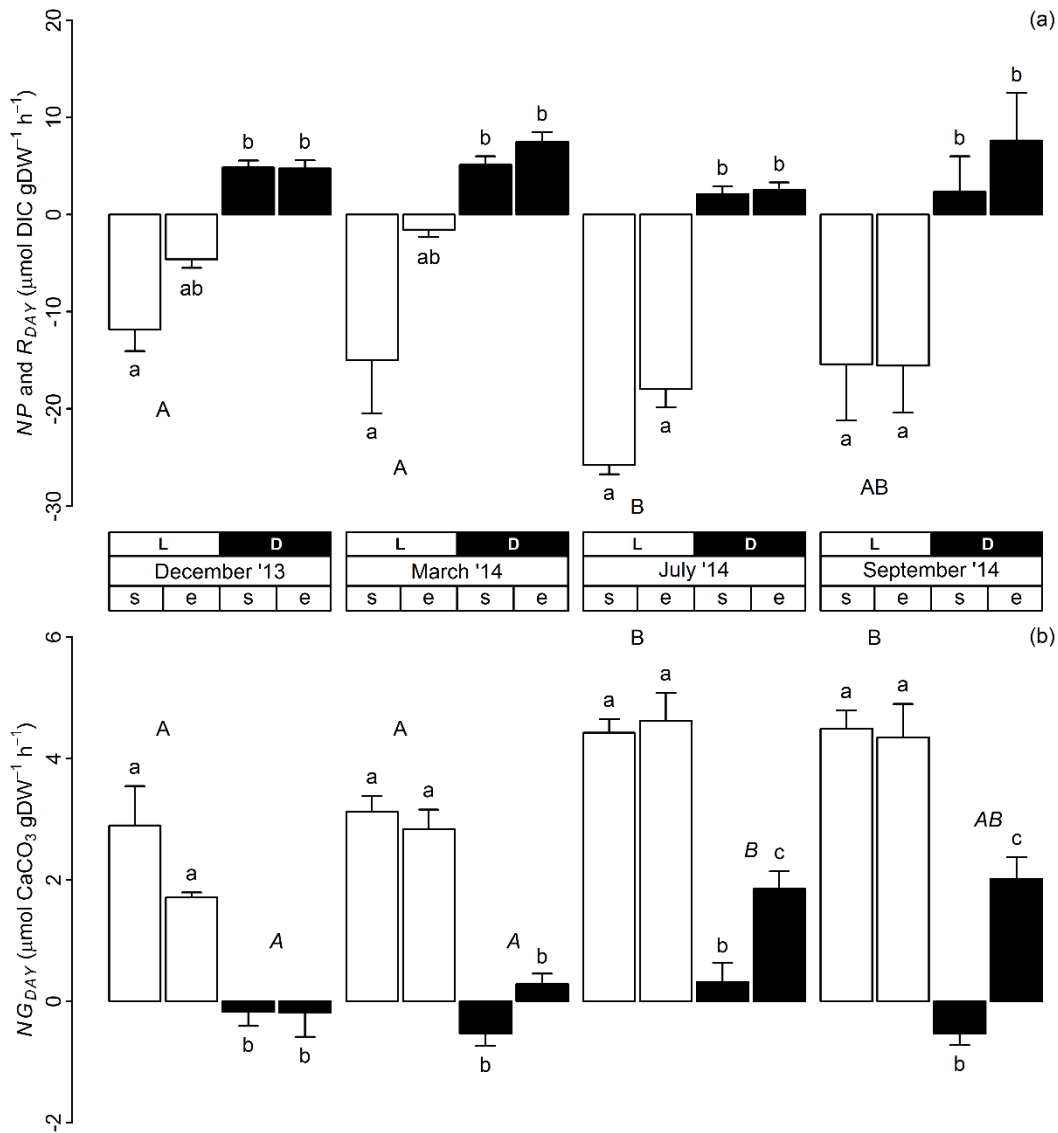

826

827 **Figure 5:** Average daytime (a)  $NP$  (-ve DIC flux) and  $R_{DAY}$  (+ve DIC flux), and (b)  
 828  $NG_{DAY}$  as determined from light (L – white bars) and dark (D – black bars) treatment  
 829 incubations conducted at the start (s) and end (e) of daytime tidal emersion periods  
 830 during December 2013 and March, July and September 2014 (Average  $\pm$  SE,  $n = 5$ ).  
 831 Upper-case and lower-case letters denote TukeyHSD homogenous subsets in relation  
 832 to the factors ‘month’ and ‘tide’, respectively.

833

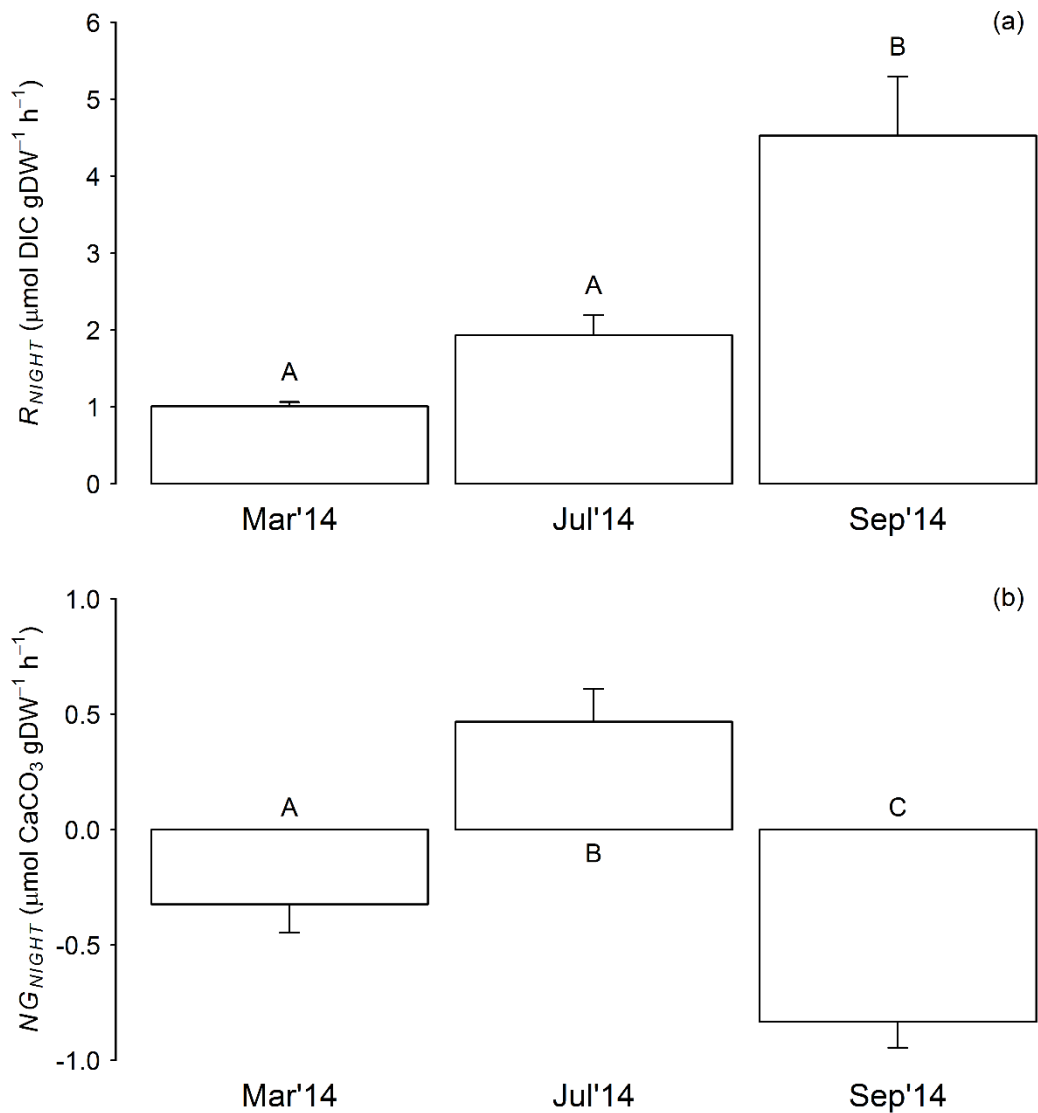

834  
 835 **Figure 6:** Average night-time (a)  $R_{NIGHT}$  and (b)  $NG_{NIGHT}$  as determined across both  
 836 light/dark treatment incubations and the start/end of tidal emersion periods (Average  
 837  $\pm$  SE, n = 20). Upper-case letters denote TukeyHSD homogenous subsets in relation  
 838 to the factor 'month'.

839

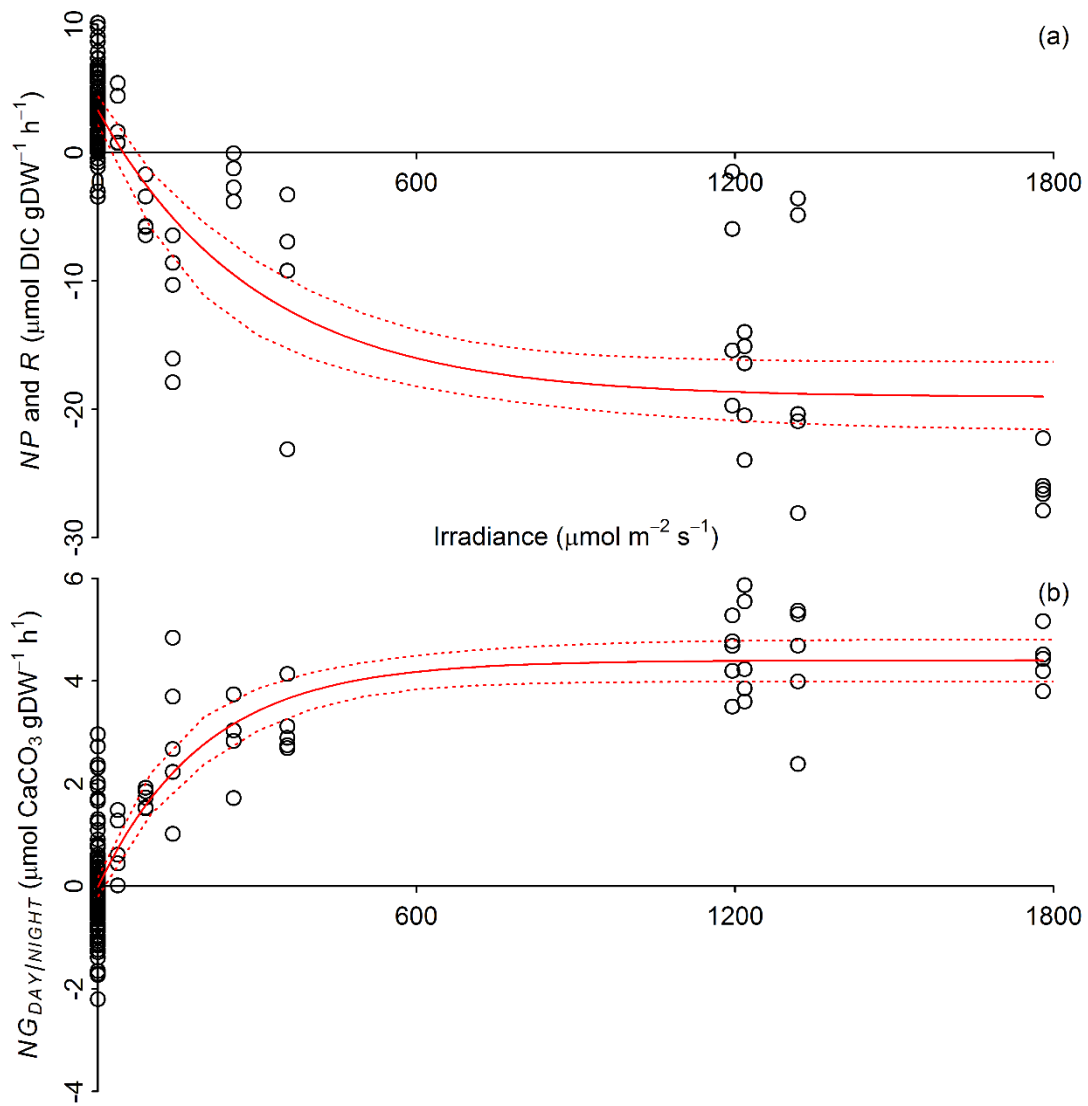

840

841 **Figure 7:** Relationship of (a) net production/respiration (*NP* and *R*) and (b) net  
 842 calcification (*NG<sub>DAY/NIGHT</sub>*) to the average irradiance measured during respective  
 843 incubations (Model 1, Table 4), showing regression line (solid red line) and 95 %  
 844 confidence intervals (dashed red lines).

845

846

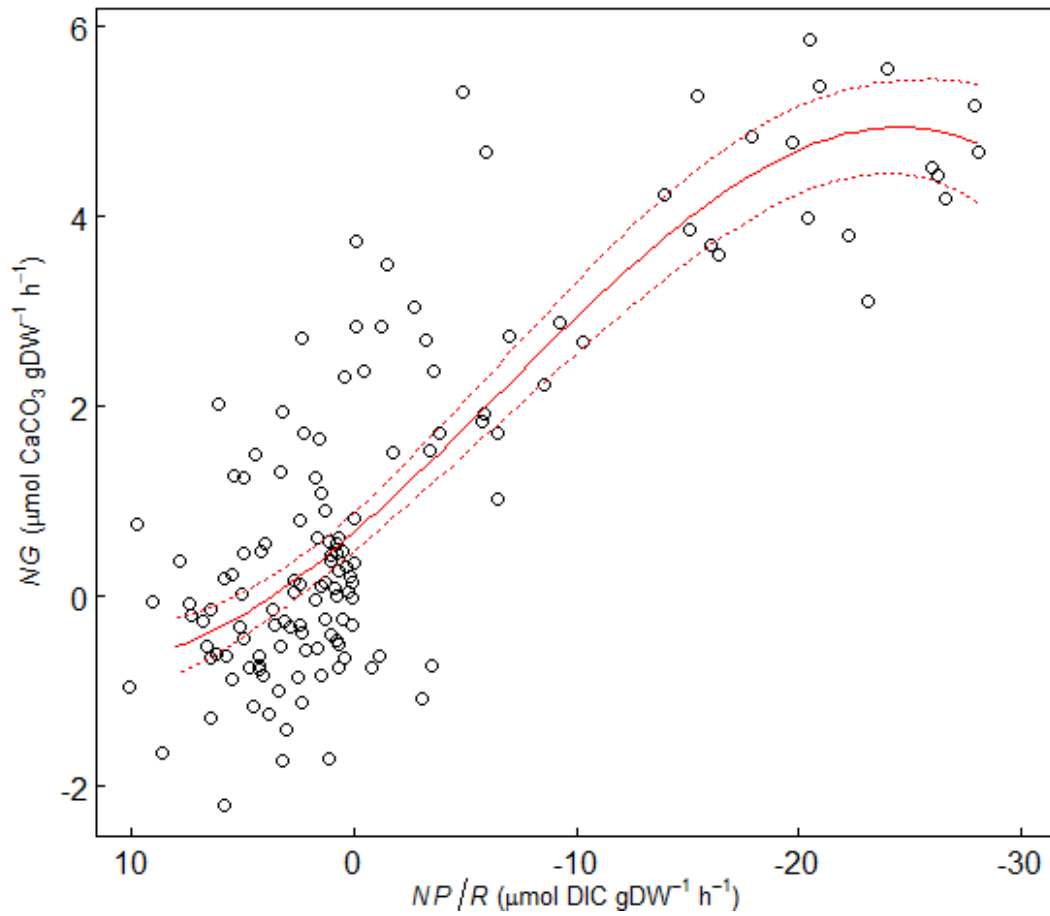

847  
848

849 **Figure 8:** Relationship between calcification ( $NG$ ) and production / respiration ( $NP/R$ ),  
850 showing regression line (solid red line) and 95 % confidence intervals (dashed red  
851 lines).

852  
853  
854  
855  
856  
857  
858  
859  
860  
861  
862

863

**Tables**

864

865 **Table 1:** Sampling dates and tidal details. Experimental rock pools were located at

866 5.5 m relative to chart datum. All times are expressed in GMT.

| Sampling Date                             |            |                                             |            |                                           |            |                                            |            |
|-------------------------------------------|------------|---------------------------------------------|------------|-------------------------------------------|------------|--------------------------------------------|------------|
| Dec 4 <sup>th</sup> /5 <sup>th</sup> 2013 |            | Mar 16 <sup>th</sup> /17 <sup>th</sup> 2014 |            | Jul 1 <sup>st</sup> /2 <sup>nd</sup> 2014 |            | Sep 9 <sup>th</sup> /10 <sup>th</sup> 2014 |            |
| Time                                      | Height (m) | Time                                        | Height (m) | Time                                      | Height (m) | Time                                       | Height (m) |
| 06:30                                     | 9.6        | 05:50                                       | 8.8        | 08:12                                     | 8.4        | 05:46                                      | 9.7        |
| 12:30                                     | 0.7        | 11:51                                       | 1.2        | 13:59                                     | 1.6        | 11:50                                      | 0.4        |
| 18:50                                     | 9.5        | 18:09                                       | 8.9        | 20:23                                     | 8.5        | 18:08                                      | 10.1       |
| 00:55                                     | 0.8        | 00:02                                       | 1          | 02:20                                     | 1.7        | 00:13                                      | 0.2        |
| 07:15                                     | 9.7        | 06:23                                       | 9          | 08:45                                     | 8.2        | 06:31                                      | 9.9        |

867

868

869 **Table 2:** Component loadings of principal components analysis of daytime and night-870 time carbonate chemistry parameters (TA, DIC, pH,  $p\text{CO}_2$ ,  $\text{HCO}_3^-$ ,  $\text{CO}_3^{2-}$ ,  $\Omega_{\text{arg}}$  and  $\Omega_{\text{cal}}$ )

871

|                           | PC1 <sub>DAY</sub> (%) | PC2 <sub>DAY</sub> (%) | PC1 <sub>NIGHT</sub> (%) | PC2 <sub>NIGHT</sub> (%) |
|---------------------------|------------------------|------------------------|--------------------------|--------------------------|
| Proportion of variance    | 84.3                   | 13.2                   | 83.6                     | 16.0                     |
| Cumulative proportion     | 84.3                   | 97.6                   | 83.6                     | 99.7                     |
| Variable                  | PC1 <sub>DAY</sub>     | PC2 <sub>DAY</sub>     | PC1 <sub>NIGHT</sub>     | PC2 <sub>NIGHT</sub>     |
| <b>Component Loadings</b> |                        |                        |                          |                          |
| TA                        | -0.07                  | 0.94                   | -0.18                    | -0.77                    |
| DIC                       | -0.36                  | 0.17                   | -0.35                    | -0.36                    |
| pH                        | 0.38                   | 0.04                   | 0.37                     | -0.16                    |
| $p\text{CO}_2$            | -0.36                  | 0.01                   | -0.38                    | 0.05                     |
| $\text{HCO}_3^-$          | -0.38                  | 0.09                   | -0.37                    | -0.23                    |
| $\text{CO}_3^{2-}$        | 0.37                   | 0.14                   | 0.37                     | -0.24                    |
| $\Omega_{\text{arg}}$     | 0.37                   | 0.14                   | 0.37                     | -0.24                    |
| $\Omega_{\text{cal}}$     | 0.37                   | 0.14                   | 0.37                     | -0.24                    |

872

**Table 3:** Multiple linear regression analysis of  $PCI_{DAY}$  in relation to irradiance (Irrad.) or cumulative photodose (Photo.) plus water temperature (Temp.), and linear regression analysis of  $PCI_{NIGHT}$  in relation to water temperature (Temp.), showing associated standard error ( $SE$ ) of coefficients, the significance of predictor variables (Pred. sig.) within the model, the percent relative importance of predictor variables (Rel. Imp.), the proportion of variance explained by the regression ( $R^2$ ), the overall model significance ( $P$ ), and the number of observations ( $n$ ).

| Relationship ( $y = a + b_1 * X_1 + b_2 * X_2$ )             | Coefficient $SE$ |             |             | Pred. sig. |        | Rel.Imp. (%) |       | $R^2$ | $P$    | $n$ |
|--------------------------------------------------------------|------------------|-------------|-------------|------------|--------|--------------|-------|-------|--------|-----|
|                                                              | $a$              | $b_1$       | $b_2$       | $X_1$      | $X_2$  | $X_1$        | $X_2$ |       |        |     |
| $PCI_{DAY} = -7.03 + -0.002 * Irrad. + 0.61 * Temp.$         | 0.73             | 0.00        | 0.07        | <0.001     | <0.001 | 28           | 71    | 0.63  | <0.001 | 96  |
| $PCI_{DAY} = -2.52 + 1.41^{-7} * Photo. + 9.10^{-2} * Temp.$ | 0.72             | $2.72^{-8}$ | $6.38^{-2}$ | <0.001     | <0.01  | 58           | 41    | 0.69  | <0.001 | 96  |
| $PCI_{NIGHT} = -2.89 + 0.22 * Temp.$                         | 1.40             | 0.10        | -           | <0.05      | <0.05  | -            | -     | 0.08  | <0.05  | 72  |

1 **Table 4:** Values of parameters (*SE* in parentheses) calculated by non-linear regression of net production (*NP*,  $\mu\text{mol DIC gDW}^{-1} \text{h}^{-1}$ ) and net  
2 calcification (*NG*,  $\mu\text{mol CaCO}_3 \text{gDW}^{-1} \text{h}^{-1}$ ): in relation to (Model 1) irradiance (*E*,  $\mu\text{mol photons m}^{-2} \text{s}^{-1}$ ), where *c* is estimated dark respiration or  
3 calcification; and in relation to (Model 2) irradiance and temperature (*T*, °C), where *f* is a constant; and in relation to (Model 3) irradiance and  
4 carbonate chemistry (*PCI*); and in relation to (Model 4) irradiance, temperature and carbonate chemistry. Asterisks denote coefficient significance  
5 in models ( $P < 0.05^*$ ,  $P < 0.01^{**}$ ,  $P < 0.001^{***}$ ). Estimation of overall model fit is presented as the proportion of variance explained by the  
6 regression ( $R^2$ ) and as Akaike Information Criterion (*AIC*). *n* denotes the number of observations.

|                                                                        | $P(G)_{max}$   | $Ek$       | <i>c</i>      | <i>d</i>      | <i>e</i>      | <i>f</i>       | $R^2$ | <i>AIC</i> | <i>n</i> |
|------------------------------------------------------------------------|----------------|------------|---------------|---------------|---------------|----------------|-------|------------|----------|
| <b>Model 1:</b> $NP (NG) = P(G)_{max} (1 - e^{-E/Ek}) + c$             |                |            |               |               |               |                |       |            |          |
| <i>NP</i>                                                              | -22.3(1.48)*** | 300(65)*** | 3.29(0.56)*** |               |               |                | 0.67  | 885        | 140      |
| <i>NG</i>                                                              | 4.41(0.22)***  | 200(34)*** | -0.01(0.09)** |               |               |                | 0.76  | 383        | 140      |
| <b>Model 2:</b> $NP (NG) = P(G)_{max} (1 - e^{-E/Ek}) + dT + f$        |                |            |               |               |               |                |       |            |          |
| <i>NP</i>                                                              | -23.8(1.97)*** | 377(99)*** |               | 0.15(0.12)    |               | 1.07(1.82)     | 0.68  | 886        | 140      |
| <i>NG</i>                                                              | 3.92(0.21)***  | 115(24)*** |               | 0.08(0.01)*** |               | -1.28(0.26)*** | 0.80  | 363        | 140      |
| <b>Model 3:</b> $NP (NG) = P(G)_{max} (1 - e^{-E/Ek}) + ePCI + f$      |                |            |               |               |               |                |       |            |          |
| <i>NP</i>                                                              | -23.0(1.62)*** | 343(80)*** |               |               | 0.29(0.20)    | 3.24(0.56)***  | 0.68  | 885        | 140      |
| <i>NG</i>                                                              | 4.18(0.21)***  | 149(27)*** |               |               | 0.13(0.03)*** | -0.03(0.08)*   | 0.79  | 367        | 140      |
| <b>Model 4:</b> $NP (NG) = P(G)_{max} (1 - e^{-E/Ek}) + dT + ePCI + f$ |                |            |               |               |               |                |       |            |          |
| <i>NP</i>                                                              | -23.6(1.96)*** | 375(99)*** |               | 0.07(0.14)    | 0.22(0.23)    | 2.12(2.12)     | 0.68  | 887        | 140      |
| <i>NG</i>                                                              | 3.94(0.20)***  | 113(23)*** |               | 0.06(0.02)**  | 0.08(0.03)*   | -0.93(0.30)**  | 0.80  | 360        | 140      |

7

8
